# Supplementary material for: Pathogen‐induced inflammation is attenuated by the iminosugar MON‐DNJ via modulation of the unfolded protein response
Source: PubMed Central journal article supplement (PMC8517592; doi:10.1111/imm.13393), 2021-08-01
Supplement: IMM-164-587-s001.pdf [file IMM-164-587-s001.pdf]

Supplemental Table 4A. UPR-associated STRING-DB networks responding to MON-DNU

| Pathway                                                           | Count | FDR      | Targets                                                                                                                                                                                                                                                                                                                                                                                                                                                                                                                                                                                                                                                                                                        |
|-------------------------------------------------------------------|-------|----------|----------------------------------------------------------------------------------------------------------------------------------------------------------------------------------------------------------------------------------------------------------------------------------------------------------------------------------------------------------------------------------------------------------------------------------------------------------------------------------------------------------------------------------------------------------------------------------------------------------------------------------------------------------------------------------------------------------------|
| response to endoplasmic reticulum stress                          | 35    | 1.43E-22 | AARS, ASNA1, ASNS, ATF3, ATF4, ATF2A2, CALR, DERL2, DNABJ11, DNABJ9, DNAC10, EIF2AK3, FAM129A, FKBP14, GFP11, HSP90B1, HSPA5, HYOU1, NPL, OCA, PDIA4, PDIA5, PDIA6, PP1R15B, PPP2C, PSMC6, SDF2L1, SEC31A, SELK, SYVN1, TRIB3, UBAA5, UFD1L, WFS1, WIP1                                                                                                                                                                                                                                                                                                                                                                                                                                                        |
| response to topologically incorrect protein                       | 29    | 7.93E-19 | AARS, ASNA1, ASNS, ATF3, ATF4, ATXN3, CALR, DDIT3, DERL2, DNABJ11, DNABJ5, DNABJ9, EIF2AK3, FKBP14, GFP11, HSP90B1, HSPA5, HSPH1, HYOU1, MANF, PDIA5, PDIA6, SDF2L1, SEC31A, SYVN1, UFD1L, WFS1, WIP1                                                                                                                                                                                                                                                                                                                                                                                                                                                                                                          |
| cellular response to topologically incorrect protein              | 26    | 7.93E-19 | AARS, ASNA1, ASNS, ATF3, ATF4, ATXN3, CALR, DDIT3, DERL2, DNABJ11, DNABJ9, EIF2AK3, FKBP14, GFP11, HSP90B1, HSPA5, HYOU1, PDIA5, PDIA6, SDF2L1, SEC31A, SYVN1, UFD1L, WFS1, WIP1                                                                                                                                                                                                                                                                                                                                                                                                                                                                                                                               |
| response to unfolded protein                                      | 26    | 2.12E-16 | AARS, ASNA1, ASNS, ATF3, ATF4, CALR, DDIT3, DERL2, DNABJ11, DNABJ5, DNABJ9, EIF2AK3, FKBP14, GFP11, HSP90B1, HSPA5, HSPH1, HYOU1, MANF, PDIA5, PDIA6, SEC31A, SYVN1, WFS1, WIP1                                                                                                                                                                                                                                                                                                                                                                                                                                                                                                                                |
| endoplasmic reticulum unfolded protein response                   | 23    | 2.12E-16 | AARS, ASNA1, ASNS, ATF3, ATF4, CALR, DDIT3, DERL2, DNABJ11, DNABJ9, EIF2AK3, FKBP14, GFP11, HSP90B1, HSPA5, HYOU1, PDIA5, PDIA6, SEC31A, SYVN1, WFS1, WIP1                                                                                                                                                                                                                                                                                                                                                                                                                                                                                                                                                     |
| cellular response to unfolded protein                             | 23    | 2.79E-16 | AARS, ASNA1, ASNS, ATF3, ATF4, CALR, DDIT3, DERL2, DNABJ11, DNABJ9, EIF2AK3, FKBP14, GFP11, HSP90B1, HSPA5, HYOU1, PDIA5, PDIA6, SEC31A, SYVN1, WFS1, WIP1                                                                                                                                                                                                                                                                                                                                                                                                                                                                                                                                                     |
| protein folding                                                   | 27    | 2.12E-14 | AARS, CALR, DNABJ4, DNABJ11, DNABJ5, DNAC10, FKBP11, FKBP14, FKBP2, FKBP4, FKBP5, HSP90B1, HSPA5, HSPH1, MLEC, PDIA4, PDIA5, PDIA6, PFDN2, PPIG, PPL1, PRKCSH, SIL1, TOP1, TUBA3D, TUBB3, WFS1                                                                                                                                                                                                                                                                                                                                                                                                                                                                                                                 |
| cellular response to stress                                       | 71    | 4.02E-14 | AARS, ANKRD1, ASNA1, ASNS, ATF4, ATMIN, ATP1B1, ATF2A2, ATXN3, BAF, BCL2A1, CALR, CD38, C12orf65, DDIT3, DDIT4, DERL2, DNABJ11, DNABJ9, DNAC10, DTX3L, DUSP6, DYRK2, EEF1D, EIF2A, K3, FAM129A, FANCE, FKBP14, FKBP4, GABARAPL2, GFP11, HSP90B1, HSPA5, HSPH1, HTRA2, HYOU1, ID2, IER3, IRAK2, KL, F4L, ARP, LIG4, MSH2, NFKBIA, NPL, OCA, PDIA4, PDIA5, PDIA6, PPP1CB, PPP1R15B, PPP2C, PSMC6, RAB9A, SDF2L1, SEC31A, SELK, SUMO1, SYVN1, TAF9, TDP2, TIMEB39A, TRIB1, TRIB3, UBAA5, UBE2T, UFD1L, WFS1, WIP1                                                                                                                                                                                                 |
| response to stress                                                | 105   | 4.00E-12 | AARS, ABAT, ACP5, ANG, ANKRD1, ASNA1, ASNS, ATF4, ATMIN, ATF2A2, ATXN3, BAF, BCL2A1, CALR, CAPZ1, CCL23, CCL42, CD163, CD38, CHST2, C12orf65, CTNNA1, CYP27B1, DDIT3, DDIT4, DERL2, DNABJ4, DNABJ11, DNABJ5, DNAC10, DTX3L, DUSP6, DYRK2, EEF1D, EIF2AK3, FKBP5, FAM129A, FANCE, FKBP14, FKBP4, GABARAPL2, GFP11, HSP90B1, HSPA5, HSPH1, HYOU1, ID2, IER3, IRAK2, KL, F4L, ARP, LIG4, MSH2, NFKBIA, NPL, OCA, PDIA4, PDIA5, PDIA6, PPIG, PPL1, PPP1CB, PPP1R15B, PPP2C, PSMC6, RAB9A, RAB18, RNF198, SDF2L1, SEC31A, SELK, SERPINE1, SIL1A4, SLCO26A6, SLCO7A5, SLFN11, SP140, SUMO1, SYVN1, TAF9, TANK, TDP2, TLR1, TIMEB39A, TNFRSF4, TRIB1, TRIB3, TRIM6, UBAA5, UBE2T, UFD1L, USP18, VWF, WFS1, WIP1, XCR1 |
| IRE1-mediated unfolded protein response                           | 13    | 7.12E-09 | ASNA1, DNABJ11, DNABJ9, FKBP14, GFP11, HSPA5, HYOU1, PDIA5, PDIA6, SEC31A, SYVN1, WFS1, WIP1                                                                                                                                                                                                                                                                                                                                                                                                                                                                                                                                                                                                                   |
| ERAD pathway                                                      | 13    | 1.29E-08 | DERL2, DNABJ9, DNAC10, HSP90B1, HSPA6, NPL, OCA, PSMC6, SDF2L1, SEL1L, SYVN1, UFD1L, WFS1                                                                                                                                                                                                                                                                                                                                                                                                                                                                                                                                                                                                                      |
| ER-associated ubiquitin-dependent protein catabolic process       | 12    | 8.06E-08 | DERL2, DNABJ9, DNAC10, HSP90B1, HSPA6, NPL, OCA, PSMC6, SDF2L1, SEL1L, SYVN1, UFD1L, WFS1                                                                                                                                                                                                                                                                                                                                                                                                                                                                                                                                                                                                                      |
| PERK-mediated unfolded protein response                           | 7     | 1.71E-07 | ASNS, ATF3, ATF4, DDIT3, EIF2AK3, HSP90B1, HSPA5                                                                                                                                                                                                                                                                                                                                                                                                                                                                                                                                                                                                                                                               |
| ER-nucleus signaling pathway                                      | 9     | 7.66E-07 | ASNS, ATF3, ATF4, ATF2A2, CALR, HSP90B1, HSP90B1, PPP1R15B, WFS1                                                                                                                                                                                                                                                                                                                                                                                                                                                                                                                                                                                                                                               |
| retrograde protein transport, ER to cytosol                       | 7     | 1.10E-06 | DERL2, HSP90B1, HSP90B1, NPL, OCA, SEL1L, SYVN1, UFD1L                                                                                                                                                                                                                                                                                                                                                                                                                                                                                                                                                                                                                                                         |
| cellular protein metabolic process                                | 90    | 1.10E-06 | ALG13, ALK, APPASNA1, ASNS, ATF3, ATF4, ATXN3, B3GNT5, C12orf65, CALR, CARS, CTR9, DDIT3, DERL2, DNABJ4, DNABJ5, DNABJ9, DNAC10, DTX3L, DUSP6, DYRK2, EEF1B2, EXT1, FICD, FKBP1, FKBP14, FKBP2, FKBP4, FKBP5, GADD45G, GP1, GFP11, GMPFB, HSP90B1, HSPA5, HSPH1, HTRA2, HYOU1, IRAK2, LYPLA1, MATK, MED21, MERIK, MLEC, MTR4, NPL, OCA, OSTC, PDIA4, PDIA5, PDIA6, PELI1, PFDN2, PGM3, PIGA, PIM2, PPIG, PPL1, PPP1CB, PRPF48, PSMC6, RNF198, ROCK1, RPLP1, RPN1, SDF2L1, SEC24D, SEC31A, SEL1L, SELT, SIL1, STREGALNAC4, SUMO1, SYVN1, TAF9, TARS, TCARS, TOP1, TOPORS, TRIB1, TRIB3, TRIM6, TUBA3D, TUBB3, UAP1, UBAA5, UBE2T, UBXN1, UFD1L, USP18, VWF, WFS1, WIP1                                          |
| protein N-linked glycosylation via asparagine                     | 14    | 6.66E-06 | ALG13, CALR, GFP11, GMPFB, MLEC, OSTC, PGM3, PRKCSH, RPN1, SEC24D, SEC31A, STREGALNAC4, SYVN1, UAP1                                                                                                                                                                                                                                                                                                                                                                                                                                                                                                                                                                                                            |
| protein N-linked glycosylation                                    | 13    | 8.95E-05 | ALG13, CALR, GFP11, GMPFB, MLEC, OSTC, PGM3, RPN1, SEC24D, SEC31A, STREGALNAC4, SYVN1, UAP1                                                                                                                                                                                                                                                                                                                                                                                                                                                                                                                                                                                                                    |
| ER overload response                                              | 5     | 0.000117 | DDIT3, EIF2AK3, HSPA5, PPP1R15B, WFS1                                                                                                                                                                                                                                                                                                                                                                                                                                                                                                                                                                                                                                                                          |
| chaperone-mediated protein folding                                | 8     | 0.000155 | CALR, FKBP11, FKBP14, FKBP2, FKBP4, FKBP5, HSPH1, PDIA4                                                                                                                                                                                                                                                                                                                                                                                                                                                                                                                                                                                                                                                        |
| proteasome-mediated ubiquitin-dependent protein catabolic process | 18    | 0.000432 | ATXN3, DDIT3, DERL2, DNABJ9, DNAC10, HSP90B1, HSPA5, NPL, OCA, PPP2C, PSMC6, SDF2L1, SEL1L, SYVN1, TOPORS, UBXN1, UFD1L, USP18, WFS1                                                                                                                                                                                                                                                                                                                                                                                                                                                                                                                                                                           |
| protein metabolic process                                         | 91    | 0.000448 | ALG13, ALK, APPASNA1, ASNS, ATF3, ATF4, B3GNT5, C12orf65, CALR, CARS, CTR9, DDIT3, DERL2, DNABJ4, DNABJ5, DNABJ9, DNAC10, DTX3L, DUSP6, DYRK2, EEF1B2, EXT1, FICD, FKBP11, FKBP14, FKBP2, FKBP4, FKBP5, GADD45G, GP1, GFP11, GMPFB, HSP90B1, HSPA5, HSPH1, HTRA2, HYOU1, IRAK2, LYPLA1, MATK, MED21, MERIK, MLEC, MTR4, NPL, OCA, OSTC, PDIA4, PDIA5, PDIA6, PELI1, PFDN2, PGM3, PIGA, PIM2, PPIG, PPL1, PPP1CB, PRPF48, PSMC6, RNF198, ROCK1, RPLP1, RPN1, SDF2L1, SEC24D, SEC31A, SEL1L, SELT, SIL1, STREGALNAC4, SUMO1, SYVN1, TAF9, TARS, TCARS, TCARS, TOPORS, TRIB1, TRIB3, TRIM6, TUBA3D, TUBB3, UAP1, UBAA5, UBE2T, UBXN1, UFD1L, USP18, VWF, WFS1, WIP1                                               |
| protein peptidyl-prolyl isomerization                             | 7     | 0.000938 | FKBP11, FKBP14, FKBP2, FKBP4, FKBP5, PPIG, PPL1                                                                                                                                                                                                                                                                                                                                                                                                                                                                                                                                                                                                                                                                |

|                                                                                                                  |    |         |                                                                                                                                                                                                                                                                                                                                                                                                                                                                                                                                                                                                                           |
|------------------------------------------------------------------------------------------------------------------|----|---------|---------------------------------------------------------------------------------------------------------------------------------------------------------------------------------------------------------------------------------------------------------------------------------------------------------------------------------------------------------------------------------------------------------------------------------------------------------------------------------------------------------------------------------------------------------------------------------------------------------------------------|
| transport                                                                                                        | 80 | 0.001   | ABAT, ADA, ALDH5A1, ANP32A, APPASNA1, ATP1B1, ATP2A2, CALR, CD163, CD396, CLC2, CTNNB1, CTNS, CYB5B1, CYP27B1, DDIT3, DERL2, DYNLC1L1, FABP5, FKBP4, G3BP1, GABARAPL2, HABP4, HERPUD1, HIA1T1, HSP90B1, HSP91, HYOU1, KNNK6, KIAA1033, KIAA1279, LINC01475, MERTK, MFS1D2, NFKBIA, NPLOC4, PDIA4, PNP, RNF198, RPLP1, RPN1, RTIP4, SARI1A, SEC11C, SEC31A, SEL1L, SELK, SELT, SERPINE1, SIL1, SLIC1047, SLIC17A9, SLIC1A4, SLIC1A5, SLIC22A16, SLIC26A6, SLIC35B1, SLIC39A14, SLIC3A2, SLIC7A1, SLIC7A5, SPOCS2, SPOCS3, SRSF11, SRSF3, SYVN1, TCP1, TMED7, TMEM38B, TOB1, TRAM2, UFD1L, UQCCH1, VPS28A, WFS1, WIP1, XCR1 |
| nucleotide-sugar biosynthetic process                                                                            | 5  | 0.00117 | GFP1T1, GMPPB, PGM3, UAP1, UGDH                                                                                                                                                                                                                                                                                                                                                                                                                                                                                                                                                                                           |
| protein folding in endoplasmic reticulum                                                                         | 4  | 0.00129 | CALR, DNAC10, HSP90B1, HSPA5                                                                                                                                                                                                                                                                                                                                                                                                                                                                                                                                                                                              |
| cell redox homeostasis                                                                                           | 8  | 0.00175 | DDIT3, DNAC10, ERO1L1B, GCLC, PDIA4, PDIA5, PDIA6, SELT                                                                                                                                                                                                                                                                                                                                                                                                                                                                                                                                                                   |
| ATF6-mediated unfolded protein response                                                                          | 4  | 0.00214 | CALR, DDIT3, HSP90B1, HSPA5                                                                                                                                                                                                                                                                                                                                                                                                                                                                                                                                                                                               |
| negative regulation of sequence-specific DNA binding transcription factor activity                               | 11 | 0.00261 | DDIT3, ID2, IRAK2, KLF4, NFKBIA, PEL1, SUMO1, TNFRSF4, TRIB1, WFS1, ZC3H12A                                                                                                                                                                                                                                                                                                                                                                                                                                                                                                                                               |
| intrinsic apoptotic signaling pathway in response to endoplasmic reticulum stress                                | 6  | 0.00261 | ATF4, DDIT3, DNAC10, EIF2AK3, SELK, TRIB3                                                                                                                                                                                                                                                                                                                                                                                                                                                                                                                                                                                 |
| peptidyl-amino acid modification                                                                                 | 30 | 0.00292 | ALG13, ALK, CALR, CTR9, DYRK2, EIF2AK3, FKBP11, FKBP14, FKBP2, FKBP4, FKBP5, GFP1T1, GMPPB, MATIK, MERTK, MLEC, OSTC, PGM3, PPI1, PRKCSH, RPN1, SEC24D, SEC31A, ST6GALN                                                                                                                                                                                                                                                                                                                                                                                                                                                   |
| cellular amino acid biosynthetic process                                                                         | 8  | 0.00499 | ABAT, ADI1, ASNS, DPYD, GPT2, MTHFD2, PSAT1, UBP1                                                                                                                                                                                                                                                                                                                                                                                                                                                                                                                                                                         |
| positive regulation of transcription from RNA polymerase II promoter in response to endoplasmic reticulum stress | 4  | 0.00605 | ATF3, ATF4, DDIT3, HSPA5                                                                                                                                                                                                                                                                                                                                                                                                                                                                                                                                                                                                  |
| single-organism carbohydrate metabolic process                                                                   | 23 | 0.00637 | ALDH5A1, ATF3, ATF4, B3GNT5, CALR, EXT1, FABP5, GCLC, GFP1T1, GMPPB, GOT1, MLEC, OSTC, PC, PGM3, PPP1CB, RPN1, SEC24D, SEC31A, ST6GALNAC4, SYVN1, UAP1, UGDH                                                                                                                                                                                                                                                                                                                                                                                                                                                              |
| positive regulation of proteasomal protein catabolic process                                                     | 8  | 0.00679 | ATXN3, GCLC, HERPUD1, PSMC6, SUMO1, TRIB1, TRIB3, ZFAND2A                                                                                                                                                                                                                                                                                                                                                                                                                                                                                                                                                                 |
| ubiquitin-dependent protein catabolic process                                                                    | 19 | 0.00715 | ATXN3, DDIT3, DERL2, DNAB, DNAB9, DNAC10, HERPUD1, HSP90B1, HSPA5, NPLOC4, PPP2CB, PSMC6, SDF2L1, SEL1L, SYVN1, TOPORS, UBXN1, UFD1L, USP18, WFS1                                                                                                                                                                                                                                                                                                                                                                                                                                                                         |
| UDP-N-acetylglucosamine biosynthetic process                                                                     | 3  | 0.00768 | GFP1T1, PGM3, UAP1                                                                                                                                                                                                                                                                                                                                                                                                                                                                                                                                                                                                        |
| protein glycosylation                                                                                            | 15 | 0.00911 | ALG13, B3GNT5, CALR, EXT1, GFP1T1, GMPPB, MLEC, OSTC, PGM3, RPN1, SEC24D, SEC31A, ST6GALNAC4, SYVN1, UAP1                                                                                                                                                                                                                                                                                                                                                                                                                                                                                                                 |
| regulation of binding                                                                                            | 14 | 0.00999 | APP, CCL23, CLIC2, DDIT3, EIF2AK3, HABP4, HERPUD1, HMGB1, HSPA5, ID2, NFKBIA, ROCK1, SUMO1, TRIB3                                                                                                                                                                                                                                                                                                                                                                                                                                                                                                                         |
| regulation of endoplasmic reticulum stress-induced intrinsic apoptotic signaling pathway                         | 5  | 0.0105  | DDIT3, HERPUD1, HYOU1, SYVN1, WFS1                                                                                                                                                                                                                                                                                                                                                                                                                                                                                                                                                                                        |
| cellular protein catabolic process                                                                               | 20 | 0.0131  | ATXN3, DDIT3, DERL2, DNAB, DNAB9, DNAC10, HERPUD1, HSP90B1, HSPA5, HTRA2, NPLOC4, PPP2CB, PSMC6, SDF2L1, SEL1L, SYVN1, TOPORS, UBXN1, UFD1L, USP18, WFS1                                                                                                                                                                                                                                                                                                                                                                                                                                                                  |
| positive regulation of proteasomal ubiquitin-dependent protein catabolic process                                 | 7  | 0.0163  | ATXN3, GCLC, HERPUD1, SUMO1, TRIB1, TRIB3, ZFAND2A                                                                                                                                                                                                                                                                                                                                                                                                                                                                                                                                                                        |
| negative regulation of endoplasmic reticulum stress-induced intrinsic apoptotic signaling pathway                | 4  | 0.0163  | HERPUD1, HYOU1, SYVN1, WFS1                                                                                                                                                                                                                                                                                                                                                                                                                                                                                                                                                                                               |
| negative regulation of response to endoplasmic reticulum stress                                                  | 5  | 0.0163  | DERL2, HERPUD1, HYOU1, PPP1R15B, SYVN1                                                                                                                                                                                                                                                                                                                                                                                                                                                                                                                                                                                    |
| protein transport                                                                                                | 35 | 0.0171  | ATP1B1, CALR, CD36, DERL2, EIF2AK3, GABARAPL2, HERPUD1, HSP90B1, KIAA1033, LINC01475, MERTK, MFS1D2, NFKBIA, NPLOC4, PDIA4, PNP, RNF198, RPLP1, RPN1, RTIP4, SARI1A, SEC11C, SEC24D, SEC31A, SEL1L, SELT, SIL1, SPOCS2, SPOCS3, SYVN1, TCP1, TMED7, TOB1, TRAM2, UFD1L, VPS28A, WFS1                                                                                                                                                                                                                                                                                                                                      |
| positive regulation of protein metabolic process                                                                 | 38 | 0.0192  | ALK, ANK, APP, ATXN3, C1QTNF1, CD276, CD38, CTNNA1, CTR9, EBI3, EIF2AK3, FAM129A, FPR1, GCLC, GDF15, GPR183, HERPUD1, HMGB1, HSPA5, HSPH1, HTRA2, IER3, IRAK2, KLF4, MIPV17L2, NFKBIA, PEL1, PSMC6, RAB18, SUMO1, TLR1, TNFSF10, TOPORS, TRIB1, TRIB3, TRIM6, WFS1, ZFAND2A                                                                                                                                                                                                                                                                                                                                               |
| endoplasmic reticulum calcium ion homeostasis                                                                    | 4  | 0.0223  | APP, ATP2A2, HERPUD1, WFS1                                                                                                                                                                                                                                                                                                                                                                                                                                                                                                                                                                                                |
| regulation of proteasomal protein catabolic process                                                              | 12 | 0.0246  | ATXN3, GABARAPL2, GCLC, HERPUD1, PSMC6, SUMO1, TAF9, TRIB1, TRIB3, UBXN1, USP18, ZFAND2A                                                                                                                                                                                                                                                                                                                                                                                                                                                                                                                                  |
| post-translational protein modification                                                                          | 15 | 0.0256  | ALG13, B3GNT5, CALR, GFP1T1, GMPPB, MLEC, PGM3, PI3A, PRKCSH, RPN1, SEC24D, SEC31A, ST6GALNAC4, SUMO1, UAP1                                                                                                                                                                                                                                                                                                                                                                                                                                                                                                               |
| protein catabolic process                                                                                        | 20 | 0.0281  | ATXN3, DDIT3, DERL2, DNAB, DNAB9, DNAC10, HSP90B1, HSPA5, HTRA2, LYPLA1, NPLOC4, PPP2CB, PSMC6, SDF2L1, SEL1L, SYVN1, TOPORS, UBXN1, UFD1L, USP18, WFS1                                                                                                                                                                                                                                                                                                                                                                                                                                                                   |
| glycosylation                                                                                                    | 14 | 0.0281  | B3GNT5, CALR, EXT1, GFP1T1, GMPPB, MLEC, OSTC, PGM3, RPN1, SEC24D, SEC31A, ST6GALNAC4, SYVN1, UAP1                                                                                                                                                                                                                                                                                                                                                                                                                                                                                                                        |

|                                                                         |    |        |                                                                                                                                                                                                                                                                                                                                                                                                                        |
|-------------------------------------------------------------------------|----|--------|------------------------------------------------------------------------------------------------------------------------------------------------------------------------------------------------------------------------------------------------------------------------------------------------------------------------------------------------------------------------------------------------------------------------|
| regulation of protein metabolic process                                 | 56 | 0.0285 | AARS, ALK, ANG, ATF3, ATXN3, BANP, C1, OTNF1, CALR, CD36, CTNNB1, CTRF9, DDT4, DERL2, DNALC10, DUSP6, EB13, EIF2AK3, FAM129A, FPR1, GABARAPL2, GCLC, GDF15, GPR183, HMOGB1, HSP90B1, HSPA5, HSPH1, HTRA2, IER3, IRAK2, KLF4, MPV17L2, NFKBIA, PELL1, PPP1CB, PPP1R15B, PSMC6, RAP1B, RGS2, SELT, SERPINE1, SPOCD1, SUMO1, TAF9, TLR1, TNFRSF4, TNFSF10, TOB1, TOPORS, TRIB1, TRIB3, TRIM5, UBXN1, USP18, WFS1, ZFAND2A |
| regulation of ATF6-mediated unfolded protein response                   | 2  | 0.0289 | HSPA5, WFS1                                                                                                                                                                                                                                                                                                                                                                                                            |
| negative regulation of protein metabolic process                        | 30 | 0.0295 | ANG, APP, ATF3, BANP, CALR, CD276, CTNNB1, DDT4, DERL2, DNALC10, DUSP6, EIF2AK3, FAM129A, GABARAPL2, GCLC, HERPUD1, HRS, HSP12, HSPH1, KLF4, PPP1R15B, PSMC6, RGS2, SERPINE1, SPOCD1, TAF9, TNFSF10, TOB1, TRIB1, TRIB3, UBXN1                                                                                                                                                                                         |
| protein maturation by protein folding                                   | 3  | 0.032  | CALR, ERO1L, WFS1                                                                                                                                                                                                                                                                                                                                                                                                      |
| glycoprotein biosynthetic process                                       | 15 | 0.0333 | ALG13, B3GNT5, CALR, EXT1, GPPPT1, GMPPB, MLEC, OSTC, PGM3, RPN1, SEC24D, SEC31A, ST6GALNAC4, SYVN1, UAP1                                                                                                                                                                                                                                                                                                              |
| regulation of proteasomal ubiquitin-dependent protein catabolic process | 9  | 0.0333 | ATXN3, GCLC, HERPUD1, SUMO1, TAF9, TRIB1, TRIB3, UBXN1, ZFAND2A                                                                                                                                                                                                                                                                                                                                                        |
| Intracellular protein transport                                         | 23 | 0.0485 | ATP1B1, CALR, DERL2, HERPUD1, HSP90B1, KPNA2, NFKBIA, NPLQC4, RPLP1, RPN1, RTP4, SAR1A, SEC11C, SEC24D, SEL1L, SIL1, SPCS2, SPCS3, SYVN1, TOB1, UFD1L, VPS26A, WFS1                                                                                                                                                                                                                                                    |

Supplemental Table 4B. Inflammation-associated STRING-DB networks responding to MON-DNJ

| Pathway                                           | Count | FDR    | Targets                                                                                                                                                                                                                                                                                                |
|---------------------------------------------------|-------|--------|--------------------------------------------------------------------------------------------------------------------------------------------------------------------------------------------------------------------------------------------------------------------------------------------------------|
| toll-like receptor signaling pathway              | 9     | 0.0168 | CD36,DUSP6,HSP90B1,IRAK2,NFKBIA,PEL1,PIK3AP1,TANK,TLR1                                                                                                                                                                                                                                                 |
| B cell activation involved in immune response     | 5     | 0.0179 | ADA,BATF,GPR183,LIG4,MSH2                                                                                                                                                                                                                                                                              |
| response to molecule of bacterial origin          | 14    | 0.0187 | ACPF5,ANKRD1,CD36,CTR9,CYP27B1,IRAK2,NFKBIA,PDE4B,PEL1,PTGES,SERPINE1,TLR1,TRIB1,ZC3H12A                                                                                                                                                                                                               |
| immune response                                   | 36    | 0.0248 | ADA,APP,BATF,CAPZA1,CCL23,CCL4L2,CD164,CD276,CD36,CTNNB1,CYP27B1,DUSP6,EBI3,GPR183,HMGB1,HSP90B1,IRAK2,LIG4,LY75,MATK,MSH2,NFKBIA,PEL1,PNP,PRKCSH,PSMC6,RNF19B,SLC26A6,SUMO1,TANK,TLR1,TNFRSF4,TNFSF10,TRIB3,TRIM5,USP18                                                                               |
| positive regulation of B cell proliferation       | 5     | 0.0289 | ADA,CD38,GPR183,PEL1,TNFRSF4                                                                                                                                                                                                                                                                           |
| positive regulation of lymphocyte proliferation   | 8     | 0.0289 | ADA,CD276,CD38,EBI3,GPR183,PEL1,PNP,TNFRSF4                                                                                                                                                                                                                                                            |
| cellular response to molecule of bacterial origin | 9     | 0.0289 | ANKRD1,CD36,CTR9,IRAK2,NFKBIA,PDE4B,SERPINE1,TLR1,ZC3H12A                                                                                                                                                                                                                                              |
| immune system process                             | 48    | 0.0292 | APP,ATP1B1,BATF,CALR,CAPZA1,CCL23,CCL4L2,CD164,CD276,CD38,CYP27B1,DDIT4,DUSP6,GPR183,HMGB1,HSP90B1,ID2,IRAK2,KLF4,LIG4,LY75,MATK,MSH2,MT1G,PDE4B,PEL1,PGM3,PIK3AP1,PNP,PRKCSH,PSMC6,RNF19B,ROCK1,SEC24D,SEC31A,SLAMF1,SLC26A6,SLC3A2,SLC7A5,SLFN11,SUMO1,TANK,TMEM91,TNFRSF4,TNFSF10,TRIB3,TRIM5,USP18 |
| response to lipopolysaccharide                    | 13    | 0.0315 | ACPF5,ANKRD1,CD36,CTR9,CYP27B1,IRAK2,NFKBIA,PDE4B,PEL1,PTGES,SERPINE1,TRIB1,ZC3H12A                                                                                                                                                                                                                    |

Supplemental Table 4C. Cell fate-associated STRING-DB networks responding to MON-DNU

| Pathway                                                                                           | Count | FDR     | Targets                                                                                                                                                                                                                                                   |
|---------------------------------------------------------------------------------------------------|-------|---------|-----------------------------------------------------------------------------------------------------------------------------------------------------------------------------------------------------------------------------------------------------------|
| intrinsic apoptotic signaling pathway                                                             | 12    | 0.00255 | ATF4,BCL2A1,DDIT3,DDIT4,DNAJC10,DYRK2,EIF2AK3,HTRA2,IER3,MSH2,SELK,TRIB3                                                                                                                                                                                  |
| intrinsic apoptotic signaling pathway in response to endoplasmic reticulum stress                 | 6     | 0.00261 | ATF4,DDIT3,DNAJC10,EIF2AK3,SELK,TRIB3                                                                                                                                                                                                                     |
| regulation of apoptotic process                                                                   | 41    | 0.00262 | AARS,ADA,ALK,ANKRD1,ASNS,ATF3,ATF4,BCL2A1,BEX2,CALR,CAST,CD38,CTNNB1,DDIT3,DUSP6,GDF15,HMGB1,HSP90B1,HSPA5,HSPH1,HTRA2,KLF4,LIG4,MERTK,MSH2,NFKBIA,PIM2,PPP1CB,PSMC6,RAD9A,ROCK1,SDF2L1,SERPINE1,SYVN1,TAFA9,TCF1,TNFRSF4,TNFSF10,TOPORS,TRAF1,WFS1       |
| regulation of cell death                                                                          | 42    | 0.00471 | AARS,ADA,ALK,ANKRD1,ASNS,ATF3,ATF4,BCL2A1,BEX2,CALR,CAST,CD38,CTNNB1,DDIT3,DDIT4,DUSP6,GDF15,HMGB1,HSP90B1,HSPA5,HSPH1,HTRA2,KLF4,LIG4,MERTK,MSH2,NFKBIA,PIM2,PPP1CB,PSMC6,RAD9A,ROCK1,SDF2L1,SERPINE1,SYVN1,TAFA9,TCF1,TNFRSF4,TNFSF10,TOPORS,TRAF1,WFS1 |
| programmed cell death                                                                             | 33    | 0.0101  | ALOX15B,APP,ATF4,BCL2A1,BEX2,C1D,CD38,CTNNB1,DDIT3,DDIT4,DNAJC10,DYRK2,GCLC,HERPUD1,HMGB1,HTRA2,KLF4,MSH2,NFKBIA,PIM2,PPP2C8,PSMC6,ROCK1,RTKN,SELK,SEMA3A,TNFRSF4,TNFRSF9,TNFSF10,TRAF1,TRIB3,ZC3H12A                                                     |
| regulation of endoplasmic reticulum stress-induced intrinsic apoptotic signaling pathway          | 5     | 0.0105  | DDIT3,HERPUD1,HYOU1,SYVN1,WFS1                                                                                                                                                                                                                            |
| regulation of apoptotic signaling pathway                                                         | 17    | 0.0137  | ATF3,BCL2A1,CTNNB1,DDIT3,GCLC,HERPUD1,HSPH1,HTRA2,IER3,PPP1CB,RAD9A,SERPINE1,SYVN1,TAFA9,TNFSF10,TRAF1,WFS1                                                                                                                                               |
| positive regulation of proteasomal ubiquitin-dependent protein catabolic process                  | 7     | 0.0163  | ATXN3,GCLC,HERPUD1,SUMO1,TRIB1,TRIB3,ZFAND2A                                                                                                                                                                                                              |
| negative regulation of endoplasmic reticulum stress-induced intrinsic apoptotic signaling pathway | 4     | 0.0163  | HERPUD1,HYOU1,SYVN1,WFS1                                                                                                                                                                                                                                  |
| apoptotic process                                                                                 | 32    | 0.0171  | ALOX15B,APP,ATF4,BCL2A1,BEX2,C1D,CD38,CTNNB1,DDIT3,DDIT4,DNAJC10,DYRK2,GCLC,HERPUD1,HMGB1,HTRA2,KLF4,LIG4,MSH2,NFKBIA,PIM2,PPP2C8,PSMC6,ROCK1,RTKN,SELK,SEMA3A,TNFRSF9,TNFSF10,TRAF1,TRIB3,ZC3H12A                                                        |
| negative regulation of neuron death                                                               | 10    | 0.0248  | AARS,ATF4,CTNNB1,GCLC,HTRA2,HYOU1,LIG4,MSH2,ROCK1,WFS1                                                                                                                                                                                                    |
| negative regulation of apoptotic signaling pathway                                                | 11    | 0.0304  | BCL2A1,CTNNB1,GCLC,HERPUD1,HSPH1,HTRA2,IER3,SERPINE1,SYVN1,TAFA9,WFS1                                                                                                                                                                                     |
| regulation of neuron death                                                                        | 12    | 0.0315  | AARS,ATF4,CTNNB1,DDIT3,DDIT4,GCLC,HTRA2,HYOU1,LIG4,MSH2,ROCK1,WFS1                                                                                                                                                                                        |
| negative regulation of apoptotic process                                                          | 26    | 0.032   | AARS,ADA,ASNS,BCL2A1,CAST,CD38,CTNNB1,EIF2AK3,HSP90B1,HSPA5,HSPH1,HTRA2,KLF4,LIG4,MERTK,MSH2,NFKBIA,PIM2,PSMC6,ROCK1,SERPINE1,SYVN1,TAFA9,TNFSF10,TOPORS,WFS1                                                                                             |
| negative regulation of cell death                                                                 | 27    | 0.0398  | AARS,ADA,ASNS,ATF4,BCL2A1,CAST,CD38,CTNNB1,EIF2AK3,HSP90B1,HSPA5,HSPH1,HTRA2,KLF4,LIG4,MERTK,MSH2,NFKBIA,PIM2,PSMC6,ROCK1,SERPINE1,SYVN1,TAFA9,TNFSF10,TOPORS,WFS1                                                                                        |
| regulation of intrinsic apoptotic signaling pathway                                               | 9     | 0.0405  | BCL2A1,DDIT3,HERPUD1,HSPH1,HTRA2,RAD9A,SYVN1,TAFA9,WFS1                                                                                                                                                                                                   |
| negative regulation of intrinsic apoptotic signaling pathway                                      | 7     | 0.0486  | BCL2A1,HERPUD1,HSPH1,HTRA2,SYVN1,TAFA9,WFS1                                                                                                                                                                                                               |
