# Supplementary material for: Pathogen‐induced inflammation is attenuated by the iminosugar MON‐DNJ via modulation of the unfolded protein response
Source: PubMed Central journal article supplement (PMC8517592; doi:10.1111/imm.13393), 2021-08-01
Supplement: IMM-164-587-s002.pdf [file IMM-164-587-s002.pdf]

**Supplemental Table 7. MON-DNJ regulated genes at 24 hours**

| <b>Gene Symbol</b> | <b>Gene Name</b>                                              |
|--------------------|---------------------------------------------------------------|
| CRELD1             | Cysteine-rich with EGF-like domains 1                         |
| CRELD2             | Cysteine-rich with EGF-like domains 2                         |
| DDIT3              | DNA-damage-inducible transcript 3                             |
| HSPA5              | Heat shock 70kDa protein 5 (glucose-regulated protein, 78kDa) |
| HYOU1              | Hypoxia up-regulated 1                                        |
| ISOC2              | Isochorismatase domain containing 2                           |
| MANF               | Mesencephalic astrocyte-derived neurotrophic factor           |
| NUCB2              | Nucleobindin 2                                                |
| PDIA4              | Protein disulfide isomerase family A, member 4                |
| PDIA6              | Protein disulfide isomerase family A, member 6                |
| SDF2L1             | Stromal cell-derived factor 2-like 1                          |
| SLC39A8            | Solute carrier family 39 (zinc transporter), member 8         |
| TMEM50B            | Transmembrane protein 50B                                     |
