# Supplementary material for: Pathogen‐induced inflammation is attenuated by the iminosugar MON‐DNJ via modulation of the unfolded protein response
Source: PubMed Central journal article supplement (PMC8517592; doi:10.1111/imm.13393), 2021-08-01
Supplement: IMM-164-587-s003.pdf [file IMM-164-587-s003.pdf]

**Supplemental Table 5. Cluster 4 gene signature members**

| <b>Gene Symbol</b> | <b>Gene Name</b>                                                                |
|--------------------|---------------------------------------------------------------------------------|
| ABAT               | 4-aminobutyrate aminotransferase                                                |
| ADI1               | Acireductone dioxygenase 1                                                      |
| ALDH5A1            | Aldehyde dehydrogenase 5 family, member A1                                      |
| ALG13              | Asparagine-linked glycosylation 13 homolog (S. cerevisiae)                      |
| AMY2B              | Amylase, alpha 2B (pancreatic)                                                  |
| ANP32A             | Acidic (leucine-rich) nuclear phosphoprotein 32 family, member A                |
| ATMIN              | ATM interactor                                                                  |
| B3GNT5             | UDP-GlcNAc:betaGal beta-1,3-N-acetylglucosaminyltransferase 5                   |
| BCAS2              | Breast carcinoma amplified sequence 2                                           |
| BCL2A1             | BCL2-related protein A1                                                         |
| C1D                | C1D nuclear receptor corepressor                                                |
| C6orf62            | Chromosome 6 open reading frame 62                                              |
| CAPZA1             | Capping protein (actin filament) muscle Z-line, alpha 1                         |
| CAST               | Calpastatin                                                                     |
| CBWD1              | COBW domain containing 1                                                        |
| CD164              | CD164 molecule, sialomucin                                                      |
| COMMD8             | COMM domain containing 8                                                        |
| CTNNB1             | Catenin (cadherin-associated protein), beta 1, 88kDa                            |
| CTR9               | Ctr9, Paf1/RNA polymerase II complex component, homolog (S. cerevisiae)         |
| CYP51A1            | Cytochrome P450, family 51, subfamily A, polypeptide 1                          |
| DYNC1LI1           | Dynein, cytoplasmic 1, light intermediate chain 1                               |
| EEF1B2             | Eukaryotic translation elongation factor 1 beta 2                               |
| FABP5              | Fatty acid binding protein 5 (psoriasis-associated)                             |
| FAM70A             | Family with sequence similarity 70, member A                                    |
| G3BP1              | GTPase activating protein (SH3 domain) binding protein 1                        |
| GABARAPL2          | GABA(A) receptor-associated protein-like 2                                      |
| GCLC               | Glutamate-cysteine ligase, catalytic subunit                                    |
| GNG10              | Guanine nucleotide binding protein (G protein), gamma 10                        |
| HCCS               | Holocytochrome c synthase                                                       |
| HIAT1              | Hippocampus abundant transcript 1                                               |
| HMGB1              | High mobility group box 1                                                       |
| HRSP12             | Heat-responsive protein 12                                                      |
| KIAA1033           | KIAA1033                                                                        |
| KIAA1279           | KIAA1279                                                                        |
| KPNA2              | Karyopherin alpha 2 (RAG cohort 1, importin alpha 1)                            |
| LIG4               | Ligase IV, DNA, ATP-dependent                                                   |
| LIN7C              | Lin-7 homolog C (C. elegans)                                                    |
| LY75               | Lymphocyte antigen 75                                                           |
| LYPLA1             | Lysophospholipase I                                                             |
| MED21              | Mediator complex subunit 21                                                     |
| MPLKIP             | M-phase specific PLK1 interacting protein                                       |
| NDUFA5             | NADH dehydrogenase (ubiquinone) 1 alpha subcomplex, 5, 13kDa                    |
| PIK3AP1            | Phosphoinositide-3-kinase adaptor protein 1                                     |
| PP1G               | Peptidylprolyl isomerase G (cyclophilin G)                                      |
| PPP1CB             | Protein phosphatase 1, catalytic subunit, beta isozyme                          |
| PPP1R15B           | Protein phosphatase 1, regulatory subunit 15B                                   |
| PPP2CB             | Protein phosphatase 2, catalytic subunit, beta isozyme                          |
| PSMC6              | Proteasome (prosome, macropain) 26S subunit, ATPase, 6                          |
| PTMA               | Prothymosin, alpha                                                              |
| RAP1B              | RAP1B, member of RAS oncogene family                                            |
| ROCK1              | Rho-associated, coiled-coil containing protein kinase 1                         |
| RPLP1              | Ribosomal protein, large, P1                                                    |
| SELT               | Selenoprotein T precursor                                                       |
| SLC39A8            | Solute carrier family 39 (zinc transporter), member 8                           |
| SRSF11             | Serine/arginine-rich splicing factor 11                                         |
| SRSF3              | Serine/arginine-rich splicing factor 3                                          |
| SUMO1              | SMT3 suppressor of mif two 3 homolog 1 (S. cerevisiae)                          |
| TAF9               | TAF9 RNA polymerase II, TATA box binding protein (TBP)-associated factor, 32kDa |
| TANK               | TRAF family member-associated NFKB activator                                    |
| TDP2               | tyrosyl-DNA phosphodiesterase 2                                                 |
| TLR1               | Toll-like receptor 1                                                            |
| TMEM38B            | Transmembrane protein 38B                                                       |
| TOPORS             | Topoisomerase I binding, arginine/serine-rich, E3 ubiquitin protein ligase      |
| TSN                | Translin                                                                        |
| TUBA3D             | Tubulin, alpha 3d                                                               |
| UQCRH              | Ubiquinol-cytochrome c reductase hinge protein                                  |
| VPS26A             | Vacuolar protein sorting 26 homolog A (S. pombe)                                |
