# Supplementary material for: Pathogen‐induced inflammation is attenuated by the iminosugar MON‐DNJ via modulation of the unfolded protein response
Source: PubMed Central journal article supplement (PMC8517592; doi:10.1111/imm.13393), 2021-08-01
Supplement: IMM-164-587-s004.pdf [file IMM-164-587-s004.pdf]

**Supplemental Table 2 Differentially expressed genes with MON-DNJ**

| <b>Gene Symbol</b> | <b>Gene Name</b>                                                         |
|--------------------|--------------------------------------------------------------------------|
| AARS               | alanyl-tRNA synthetase                                                   |
| ABAT               | 4-aminobutyrate aminotransferase                                         |
| ACN9               | ACN9 homolog ( <i>S. cerevisiae</i> )                                    |
| ACP5               | Acid phosphatase 5, tartrate resistant                                   |
| ADA                | Adenosine deaminase                                                      |
| ADI1               | Acireductone dioxygenase 1                                               |
| AGPAT9             | 1-acylglycerol-3-phosphate O-acyltransferase 9                           |
| ALDH1L2            | Aldehyde dehydrogenase 1 family, member L2                               |
| ALDH5A1            | Aldehyde dehydrogenase 5 family, member A1                               |
| ALG13              | Asparagine-linked glycosylation 13 homolog ( <i>S. cerevisiae</i> )      |
| ALK                | Anaplastic lymphoma receptor tyrosine kinase                             |
| ALOX15B            | Arachidonate 15-lipoxygenase, type B                                     |
| AMY2B              | Amylase, alpha 2B (pancreatic)                                           |
| ANG                | Angiogenin, ribonuclease, RNase A family, 5                              |
| ANKRD1             | Ankyrin repeat domain 1 (cardiac muscle)                                 |
| ANP32A             | Acidic (leucine-rich) nuclear phosphoprotein 32 family, member A         |
| APP                | Amyloid beta (A4) precursor protein                                      |
| ARHGEF10L          | Rho guanine nucleotide exchange factor (GEF) 10-like                     |
| ARMCX2             | Armadillo repeat containing, X-linked 2                                  |
| ASNA1              | arsA arsenite transporter, ATP-binding, homolog 1 (bacterial)            |
| ASNS               | Asparagine synthetase (glutamine-hydrolyzing)                            |
| ATF3               | Activating transcription factor 3                                        |
| ATF4               | Activating transcription factor 4 (tax-responsive enhancer element B67)  |
| ATF7IP2            | Activating transcription factor 7 interacting protein 2                  |
| ATL1               | Atlantin GTPase 1                                                        |
| ATMIN              | ATM interactor                                                           |
| ATP1B1             | ATPase, Na <sup>+</sup> /K <sup>+</sup> transporting, beta 1 polypeptide |
| ATP2A2             | ATPase, Ca <sup>++</sup> transporting, cardiac muscle, slow twitch 2     |
| ATXN3              | Ataxin 3                                                                 |
| B3GNT5             | UDP-GlcNAc:betaGal beta-1,3-N-acetylglucosaminyltransferase 5            |
| BANP               | BTG3 associated nuclear protein                                          |
| BATF               | Basic leucine zipper transcription factor, ATF-like                      |
| BCAS2              | Breast carcinoma amplified sequence 2                                    |
| BCL2A1             | BCL2-related protein A1                                                  |
| BEX2               | Brain expressed X-linked 2                                               |
| BORA               | Bora, aurora kinase A activator                                          |
| C12orf23           | Chromosome 12 open reading frame 23                                      |
| C12orf65           | Chromosome 12 open reading frame 65                                      |
| C1D                | C1D nuclear receptor corepressor                                         |
| C1QTNF1            | C1q and tumor necrosis factor related protein 1                          |
| C6orf62            | Chromosome 6 open reading frame 62                                       |
| CABLES2            | Cdk5 and Abl enzyme substrate 2                                          |
| CALR               | Calreticulin                                                             |
| CAPZA1             | Capping protein (actin filament) muscle Z-line, alpha 1                  |
| CARS               | cysteinyl-tRNA synthetase                                                |
| CAST               | Calpastatin                                                              |
| CBWD1              | COBW domain containing 1                                                 |
| CCDC167            | Coiled-coil domain containing 167                                        |
| CCDC28B            | Coiled-coil domain containing 28B                                        |
| CCDC60             | Coiled-coil domain containing 60                                         |
| CCL23              | Chemokine (C-C motif) ligand 23                                          |
| CCL4L2             | Chemokine (C-C motif) ligand 4-like 2                                    |
| CCNG2              | Cyclin G2                                                                |
| CCPG1              | Cell cycle progression 1                                                 |
| CD163              | CD163 molecule                                                           |
| CD164              | CD164 molecule, sialomucin                                               |
| CD276              | CD276 molecule                                                           |
| CD36               | CD36 molecule (thrombospondin receptor)                                  |
| CD38               | CD38 molecule                                                            |
| CDC42EP3           | CDC42 effector protein (Rho GTPase binding) 3                            |
| CDK2AP2            | Cyclin-dependent kinase 2 associated protein 2                           |
| CDR2               | Cerebellar degeneration-related protein 2, 62kDa                         |
| CDRT4              | CMT1A duplicated region transcript 4                                     |
| CHST2              | Carbohydrate (N-acetylglucosamine-6-O) sulfotransferase 2                |
| CISD2              | CDGSH iron sulfur domain 2                                               |
| CLIC2              | Chloride intracellular channel 2                                         |

|            |                                                                             |
|------------|-----------------------------------------------------------------------------|
| COMMD8     | COMM domain containing 8                                                    |
| CRELD1     | Cysteine-rich with EGF-like domains 1                                       |
| CRELD2     | Cysteine-rich with EGF-like domains 2                                       |
| CTNNB1     | Catenin (cadherin-associated protein), beta 1, 88kDa                        |
| CTNS       | Cystinosin, lysosomal cystine transporter                                   |
| CTR9       | Ctr9, Paf1/RNA polymerase II complex component, homolog (S. cerevisiae)     |
| CYB561     | Cytochrome b-561                                                            |
| CYP27B1    | Cytochrome P450, family 27, subfamily B, polypeptide 1                      |
| CYP51A1    | Cytochrome P450, family 51, subfamily A, polypeptide 1                      |
| DDIT3      | DNA-damage-inducible transcript 3                                           |
| DDIT4      | DNA-damage-inducible transcript 4                                           |
| DDX17      | DEAD (Asp-Glu-Ala-Asp) box helicase 17                                      |
| DERL2      | Derlin 2                                                                    |
| DHRS11     | Dehydrogenase/reductase (SDR family) member 11                              |
| DNAAF1     | Dynein, axonemal, assembly factor 1                                         |
| DNAJA4     | DnaJ (Hsp40) homolog, subfamily A, member 4                                 |
| DNAJB11    | DnaJ (Hsp40) homolog, subfamily B, member 11                                |
| DNAJB5     | DnaJ (Hsp40) homolog, subfamily B, member 5                                 |
| DNAJB9     | DnaJ (Hsp40) homolog, subfamily B, member 9                                 |
| DNAJC10    | DnaJ (Hsp40) homolog, subfamily C, member 10                                |
| DPCR1      | Diffuse panbronchiolitis critical region 1                                  |
| DPYD       | Dihydropyrimidine dehydrogenase                                             |
| DTX3L      | Deltex 3-like (Drosophila)                                                  |
| DUSP6      | Dual specificity phosphatase 6                                              |
| DYNC1L1    | Dynein, cytoplasmic 1, light intermediate chain 1                           |
| DYRK2      | Dual-specificity tyrosine-(Y)-phosphorylation regulated kinase 2            |
| EBI3       | Epstein-Barr virus induced 3                                                |
| EEF1B2     | Eukaryotic translation elongation factor 1 beta 2                           |
| EEPD1      | Endonuclease/exonuclease/phosphatase family domain containing 1             |
| EIF2AK3    | Eukaryotic translation initiation factor 2-alpha kinase 3                   |
| ELOVL6     | ELOVL fatty acid elongase 6                                                 |
| ENTPD7     | Ectonucleoside triphosphate diphosphohydrolase 7                            |
| ERO1LB     | ERO1-like beta (S. cerevisiae)                                              |
| EVI5L      | Ecotropic viral integration site 5-like                                     |
| EVL        | Enah/Vasp-like                                                              |
| EXT1       | Exostosin 1                                                                 |
| FABP5      | Fatty acid binding protein 5 (psoriasis-associated)                         |
| FAM129A    | Family with sequence similarity 129, member A                               |
| FAM63A     | Family with sequence similarity 63, member A                                |
| FAM70A     | Family with sequence similarity 70, member A                                |
| FANCE      | Fanconi anemia, complementation group E                                     |
| FGFBP3     | Fibroblast growth factor binding protein 3                                  |
| FICD       | FIC domain containing                                                       |
| FKBP11     | FK506 binding protein 11, 19 kDa                                            |
| FKBP14     | FK506 binding protein 14, 22 kDa                                            |
| FKBP2      | FK506 binding protein 2, 13kDa                                              |
| FKBP4      | FK506 binding protein 4, 59kDa                                              |
| FKBP5      | FK506 binding protein 5                                                     |
| FNDC3A     | Fibronectin type III domain containing 3A                                   |
| FNDC3B     | Fibronectin type III domain containing 3B                                   |
| FPR1       | Formyl peptide receptor 1                                                   |
| FPR3       | Formyl peptide receptor 3                                                   |
| FZD2       | Frizzled family receptor 2                                                  |
| G3BP1      | GTPase activating protein (SH3 domain) binding protein 1                    |
| GABARAPL2  | GABA(A) receptor-associated protein-like 2                                  |
| GABRE      | Gamma-aminobutyric acid (GABA) A receptor, epsilon                          |
| GADD45GIP1 | Growth arrest and DNA-damage-inducible, gamma interacting protein 1         |
| GCLC       | Glutamate-cysteine ligase, catalytic subunit                                |
| GDF15      | Growth differentiation factor 15                                            |
| GFPT1      | Glutamine--fructose-6-phosphate transaminase 1                              |
| GMPPB      | GDP-mannose pyrophosphorylase B                                             |
| GNB4       | Guanine nucleotide binding protein (G protein), beta polypeptide 4          |
| GNG10      | Guanine nucleotide binding protein (G protein), gamma 10                    |
| GNL3       | Guanine nucleotide binding protein-like 3 (nucleolar)                       |
| GOT1       | Glutamic-oxaloacetic transaminase 1, soluble (aspartate aminotransferase 1) |
| GPR132     | G protein-coupled receptor 132                                              |
| GPR183     | G protein-coupled receptor 183                                              |
| GPT2       | Glutamic pyruvate transaminase (alanine aminotransferase) 2                 |

|          |                                                                                                      |
|----------|------------------------------------------------------------------------------------------------------|
| GRAMD1A  | GRAM domain containing 1A                                                                            |
| GYPC     | Glycophorin C (Gerbich blood group)                                                                  |
| HABP4    | Hyaluronan binding protein 4                                                                         |
| HCCS     | Holocytochrome c synthase                                                                            |
| HERPUD1  | Homocysteine-inducible, endoplasmic reticulum stress-inducible, ubiquitin-like domain member 1       |
| HIAT1    | Hippocampus abundant transcript 1                                                                    |
| HMGB1    | High mobility group box 1                                                                            |
| HRSP12   | Heat-responsive protein 12                                                                           |
| HSP90B1  | Heat shock protein 90kDa beta (Grp94), member 1                                                      |
| HSPA13   | Heat shock protein 70kDa family, member 13                                                           |
| HSPA1A   | Heat shock 70kDa protein 1A                                                                          |
| HSPA5    | Heat shock 70kDa protein 5 (glucose-regulated protein, 78kDa)                                        |
| HSPH1    | Heat shock 105kDa/110kDa protein 1                                                                   |
| HTRA2    | HtrA serine peptidase 2                                                                              |
| HYOU1    | Hypoxia up-regulated 1                                                                               |
| ID2      | Inhibitor of DNA binding 2, dominant negative helix-loop-helix protein                               |
| IER3     | Immediate early response 3                                                                           |
| IRAK2    | Interleukin-1 receptor-associated kinase 2                                                           |
| ISOC2    | Isochorismatase domain containing 2                                                                  |
| KCNK6    | Potassium channel, subfamily K, member 6                                                             |
| KCTD15   | Potassium channel tetramerisation domain containing 15                                               |
| KIAA1033 | KIAA1033                                                                                             |
| KIAA1279 | KIAA1279                                                                                             |
| KLF4     | Kruppel-like factor 4 (gut)                                                                          |
| KPNA2    | Karyopherin alpha 2 (RAG cohort 1, importin alpha 1)                                                 |
| LAD1     | Ladinin 1                                                                                            |
| LAMB3    | Laminin, beta 3                                                                                      |
| LARP1B   | La ribonucleoprotein domain family, member 1B                                                        |
| LARP4    | La ribonucleoprotein domain family, member 4                                                         |
| LIG4     | Ligase IV, DNA, ATP-dependent                                                                        |
| LIMA1    | LIM domain and actin binding 1                                                                       |
| LIN7C    | Lin-7 homolog C (C. elegans)                                                                         |
| LMO4     | LIM domain only 4                                                                                    |
| LTBP3    | Latent transforming growth factor beta binding protein 3                                             |
| LY75     | Lymphocyte antigen 75                                                                                |
| LY9      | Lymphocyte antigen 9                                                                                 |
| LYPLA1   | Lysophospholipase I                                                                                  |
| MAF      | V-maf musculoaponeurotic fibrosarcoma oncogene homolog (avian)                                       |
| MANF     | Mesencephalic astrocyte-derived neurotrophic factor                                                  |
| MATK     | Megakaryocyte-associated tyrosine kinase                                                             |
| MBNL2    | Muscleblind-like splicing regulator 2                                                                |
| ME3      | Malic enzyme 3, NADP(+)-dependent, mitochondrial                                                     |
| MED21    | Mediator complex subunit 21                                                                          |
| MEI1     | Meiosis inhibitor 1                                                                                  |
| MERTK    | C-mer proto-oncogene tyrosine kinase                                                                 |
| METRNL   | Meteorin, glial cell differentiation regulator-like                                                  |
| MFSD2A   | Major facilitator superfamily domain containing 2A                                                   |
| MIS12    | MIS12, MIND kinetochore complex component, homolog (S. pombe)                                        |
| MLEC     | Malectin                                                                                             |
| MPLKIP   | M-phase specific PLK1 interacting protein                                                            |
| MPV17L2  | MPV17 mitochondrial membrane protein-like 2                                                          |
| MSH2     | mutS homolog 2, colon cancer, nonpolyposis type 1 (E. coli)                                          |
| MSTO1    | Misato homolog 1 (Drosophila)                                                                        |
| MT1G     | Metallothionein 1G                                                                                   |
| MT1H     | Metallothionein 1H                                                                                   |
| MT1M     | Metallothionein 1M                                                                                   |
| MTFR1    | Mitochondrial fission regulator 1                                                                    |
| MTHFD2   | Methylenetetrahydrofolate dehydrogenase (NADP+ dependent) 2, methenyltetrahydrofolate cyclohydrolase |
| MTMR4    | Myotubularin related protein 4                                                                       |
| MYOM2    | Myomesin 2                                                                                           |
| N4BP2    | NEDD4 binding protein 2                                                                              |
| NDUFA5   | NADH dehydrogenase (ubiquinone) 1 alpha subcomplex, 5, 13kDa                                         |
| NFKBIA   | Nuclear factor of kappa light polypeptide gene enhancer in B-cells inhibitor, alpha                  |
| NFXL1    | Nuclear transcription factor, X-box binding-like 1                                                   |
| NPLOC4   | Nuclear protein localization 4 homolog (S. cerevisiae)                                               |
| NUCB2    | Nucleobindin 2                                                                                       |
| OSTC     | Oligosaccharyltransferase complex subunit                                                            |
| PC       | Pyruvate carboxylase                                                                                 |

|          |                                                                                               |
|----------|-----------------------------------------------------------------------------------------------|
| PDE4B    | Phosphodiesterase 4B, cAMP-specific                                                           |
| PDIA4    | Protein disulfide isomerase family A, member 4                                                |
| PDIA5    | Protein disulfide isomerase family A, member 5                                                |
| PDIA6    | Protein disulfide isomerase family A, member 6                                                |
| PELI1    | Pellino E3 ubiquitin protein ligase 1                                                         |
| PFDN2    | Prefoldin subunit 2                                                                           |
| PGM3     | Phosphoglucomutase 3                                                                          |
| PIGA     | Phosphatidylinositol glycan anchor biosynthesis, class A                                      |
| PIK3AP1  | Phosphoinositide-3-kinase adaptor protein 1                                                   |
| PIM2     | Pim-2 oncogene                                                                                |
| PLEKHJ1  | Pleckstrin homology domain containing, family J member 1                                      |
| PNP      | Purine nucleoside phosphorylase                                                               |
| PPIG     | Peptidylprolyl isomerase G (cyclophilin G)                                                    |
| PPIL1    | Peptidylprolyl isomerase (cyclophilin)-like 1                                                 |
| PPP1CB   | Protein phosphatase 1, catalytic subunit, beta isozyme                                        |
| PPP1R15B | Protein phosphatase 1, regulatory subunit 15B                                                 |
| PPP2CB   | Protein phosphatase 2, catalytic subunit, beta isozyme                                        |
| PRKCSH   | Protein kinase C substrate 80K-H                                                              |
| PRPF4B   | PRP4 pre-mRNA processing factor 4 homolog B (yeast)                                           |
| PRRC1    | Proline-rich coiled-coil 1                                                                    |
| PSAT1    | Phosphoserine aminotransferase 1                                                              |
| PSMC6    | Proteasome (prosome, macropain) 26S subunit, ATPase, 6                                        |
| PSTPIP2  | Proline-serine-threonine phosphatase interacting protein 2                                    |
| PTGES    | Prostaglandin E synthase                                                                      |
| PTMA     | Prothymosin, alpha                                                                            |
| RABAC1   | Rab acceptor 1 (prenylated)                                                                   |
| RAD9A    | RAD9 homolog A ( <i>S. pombe</i> )                                                            |
| RAP1B    | RAP1B, member of RAS oncogene family                                                          |
| RCC1     | Regulator of chromosome condensation 1                                                        |
| RGS2     | Regulator of G-protein signaling 2, 24kDa                                                     |
| RNASE4   | Ribonuclease, RNase A family, 4                                                               |
| RNF19B   | Ring finger protein 19B                                                                       |
| ROCK1    | Rho-associated, coiled-coil containing protein kinase 1                                       |
| RPLP1    | Ribosomal protein, large, P1                                                                  |
| RPN1     | Ribophorin I                                                                                  |
| RTKN     | Rhotekin                                                                                      |
| RTP4     | Receptor (chemosensory) transporter protein 4                                                 |
| SAR1A    | SAR1 homolog A ( <i>S. cerevisiae</i> )                                                       |
| SDF2L1   | Stromal cell-derived factor 2-like 1                                                          |
| SEC11C   | SEC11 homolog C ( <i>S. cerevisiae</i> )                                                      |
| SEC24D   | SEC24 family, member D ( <i>S. cerevisiae</i> )                                               |
| SEC31A   | SEC31 homolog A ( <i>S. cerevisiae</i> )                                                      |
| SEL1L    | Sel-1 suppressor of lin-12-like ( <i>C. elegans</i> )                                         |
| SELK     | Selenoprotein K                                                                               |
| SELT     | Selenoprotein T precursor                                                                     |
| SEMA3A   | Sema domain, immunoglobulin domain (Ig), short basic domain, secreted, (semaphorin) 3A        |
| SERPINE1 | Serpin peptidase inhibitor, clade E (nexin, plasminogen activator inhibitor type 1), member 1 |
| SERTAD3  | SERTA domain containing 3                                                                     |
| SIL1     | SIL1 homolog, endoplasmic reticulum chaperone ( <i>S. cerevisiae</i> )                        |
| SLA      | Src-like-adaptor                                                                              |
| SLAMF1   | Signaling lymphocytic activation molecule family member 1                                     |
| SLC10A7  | Solute carrier family 10 (sodium/bile acid cotransporter family), member 7                    |
| SLC17A9  | Solute carrier family 17, member 9                                                            |
| SLC1A4   | Solute carrier family 1 (glutamate/neutral amino acid transporter), member 4                  |
| SLC1A5   | Solute carrier family 1 (neutral amino acid transporter), member 5                            |
| SLC22A16 | Solute carrier family 22 (organic cation/carnitine transporter), member 16                    |
| SLC26A6  | Solute carrier family 26, member 6                                                            |
| SLC35B1  | Solute carrier family 35, member B1                                                           |
| SLC39A14 | Solute carrier family 39 (zinc transporter), member 14                                        |
| SLC39A8  | Solute carrier family 39 (zinc transporter), member 8                                         |
| SLC3A2   | Solute carrier family 3 (activators of dibasic and neutral amino acid transport), member 2    |
| SLC7A1   | Solute carrier family 7 (cationic amino acid transporter, y+ system), member 1                |
| SLC7A5   | Solute carrier family 7 (amino acid transporter light chain, L system), member 5              |
| SLC9A9   | Solute carrier family 9, subfamily A (NHE9, cation proton antiporter 9), member 9             |
| SLFN11   | Schlafen family member 11                                                                     |
| SP140    | SP140 nuclear body protein                                                                    |
| SPCS2    | Signal peptidase complex subunit 2 homolog ( <i>S. cerevisiae</i> )                           |
| SPCS3    | Signal peptidase complex subunit 3 homolog ( <i>S. cerevisiae</i> )                           |

|            |                                                                                                              |
|------------|--------------------------------------------------------------------------------------------------------------|
| SPOCD1     | SPOC domain containing 1                                                                                     |
| SRSF11     | Serine/arginine-rich splicing factor 11                                                                      |
| SRSF3      | Serine/arginine-rich splicing factor 3                                                                       |
| ST6GALNAC4 | ST6 (alpha-N-acetyl-neuraminy-2,3-beta-galactosyl-1,3)-N-acetylgalactosaminide alpha-2,6-sialyltransferase 4 |
| SUMO1      | SMT3 suppressor of mif two 3 homolog 1 (S. cerevisiae)                                                       |
| SYVN1      | Synovial apoptosis inhibitor 1, synoviolin                                                                   |
| TAF9       | TAF9 RNA polymerase II, TATA box binding protein (TBP)-associated factor, 32kDa                              |
| TANK       | TRAF family member-associated NFKB activator                                                                 |
| TARS       | threonyl-tRNA synthetase                                                                                     |
| TCP1       | T-complex 1                                                                                                  |
| TDP2       | tyrosyl-DNA phosphodiesterase 2                                                                              |
| TES        | Testis derived transcript (3 LIM domains)                                                                    |
| TLR1       | Toll-like receptor 1                                                                                         |
| TMED7      | Transmembrane emp24 protein transport domain containing 7                                                    |
| TMEM163    | Transmembrane protein 163                                                                                    |
| TMEM38B    | Transmembrane protein 38B                                                                                    |
| TMEM39A    | Transmembrane protein 39A                                                                                    |
| TMEM41B    | Transmembrane protein 41B                                                                                    |
| TMEM50B    | Transmembrane protein 50B                                                                                    |
| TMEM91     | Transmembrane protein 91                                                                                     |
| TNFRSF4    | Tumor necrosis factor receptor superfamily, member 4                                                         |
| TNFRSF9    | Tumor necrosis factor receptor superfamily, member 9                                                         |
| TNFSF10    | Tumor necrosis factor (ligand) superfamily, member 10                                                        |
| TOB1       | Transducer of ERBB2, 1                                                                                       |
| TOPORS     | Topoisomerase I binding, arginine/serine-rich, E3 ubiquitin protein ligase                                   |
| TRAF1      | TNF receptor-associated factor 1                                                                             |
| TRAM2      | Translocation associated membrane protein 2                                                                  |
| TRIB1      | Tribbles homolog 1 (Drosophila)                                                                              |
| TRIB3      | Tribbles homolog 3 (Drosophila)                                                                              |
| TRIM47     | Tripartite motif containing 47                                                                               |
| TRIM5      | Tripartite motif containing 5                                                                                |
| TSN        | Translin                                                                                                     |
| TUBA3D     | Tubulin, alpha 3d                                                                                            |
| TUBB3      | Tubulin, beta 3 class III                                                                                    |
| UAP1       | UDP-N-acetylglucosamine pyrophosphorylase 1                                                                  |
| UBA5       | Ubiquitin-like modifier activating enzyme 5                                                                  |
| UBE2T      | Ubiquitin-conjugating enzyme E2T (putative)                                                                  |
| UBXN1      | UBX domain protein 1                                                                                         |
| UFD1L      | Ubiquitin fusion degradation 1 like (yeast)                                                                  |
| UGDH       | UDP-glucose 6-dehydrogenase                                                                                  |
| UPB1       | Ureidopropionase, beta                                                                                       |
| UQCRH      | Ubiquinol-cytochrome c reductase hinge protein                                                               |
| USP18      | Ubiquitin specific peptidase 18                                                                              |
| VPS26A     | Vacuolar protein sorting 26 homolog A (S. pombe)                                                             |
| VSX2       | Visual system homeobox 2                                                                                     |
| VWF        | Von Willebrand factor                                                                                        |
| WFS1       | Wolfram syndrome 1 (wolframin)                                                                               |
| WIPI1      | WD repeat domain, phosphoinositide interacting 1                                                             |
| WTAP       | Wilms tumor 1 associated protein                                                                             |
| XCR1       | Chemokine (C motif) receptor 1                                                                               |
| ZC3H12A    | Zinc finger CCCH-type containing 12A                                                                         |
| ZFAND2A    | Zinc finger, AN1-type domain 2A                                                                              |
| ZNF395     | Zinc finger protein 395                                                                                      |
| ZNF768     | Zinc finger protein 768                                                                                      |

---
