# Supplementary material for: Pathogen‐induced inflammation is attenuated by the iminosugar MON‐DNJ via modulation of the unfolded protein response
Source: PubMed Central journal article supplement (PMC8517592; doi:10.1111/imm.13393), 2021-08-01
Supplement: IMM-164-587-s005.pdf [file IMM-164-587-s005.pdf]

**Supplemental Table 3A. STRING-DB network analysis for biological process enrichment of Cluster 1 transcripts**

| Pathway                                                                                           | Count | FDR      | Targets                                                                                                                     |
|---------------------------------------------------------------------------------------------------|-------|----------|-----------------------------------------------------------------------------------------------------------------------------|
| response to endoplasmic reticulum stress                                                          | 15    | 8.67E-17 | AARS,ASNS,DERL2,DNAJB11,DNAJB9,HERPUD1,HSP90B1,HSPA5,HYOU1,PDIA4,PDIA6,SDF2L1,SELK,SYVN1,TRIB3                              |
| response to topologically incorrect protein                                                       | 14    | 1.30E-16 | AARS,ASNS,DDIT3,DERL2,DNAJB11,DNAJB9,HERPUD1,HSP90B1,HSPA5,HYOU1,MANF,PDIA6,SDF2L1,SYVN1                                    |
| cellular response to topologically incorrect protein                                              | 13    | 1.30E-16 | AARS,ASNS,DDIT3,DERL2,DNAJB11,DNAJB9,HERPUD1,HSP90B1,HSPA5,HYOU1,PDIA6,SDF2L1,SYVN1                                         |
| response to unfolded protein                                                                      | 13    | 1.89E-15 | AARS,ASNS,DDIT3,DERL2,DNAJB11,DNAJB9,HERPUD1,HSP90B1,HSPA5,HYOU1,MANF,PDIA6,SYVN1                                           |
| endoplasmic reticulum unfolded protein response                                                   | 12    | 1.89E-15 | AARS,ASNS,DDIT3,DERL2,DNAJB11,DNAJB9,HERPUD1,HSP90B1,HSPA5,HYOU1,PDIA6,SYVN1                                                |
| cellular response to unfolded protein                                                             | 12    | 2.24E-15 | AARS,ASNS,DDIT3,DERL2,DNAJB11,DNAJB9,HERPUD1,HSP90B1,HSPA5,HYOU1,PDIA6,SYVN1                                                |
| ERAD pathway                                                                                      | 8     | 4.37E-10 | DERL2,DNAJB9,HERPUD1,HSP90B1,HSPA5,SDF2L1,SEL1L,SYVN1                                                                       |
| ER-associated ubiquitin-dependent protein catabolic process                                       | 7     | 2.20E-08 | DERL2,DNAJB9,HSP90B1,HSPA5,SDF2L1,SEL1L,SYVN1                                                                               |
| retrograde protein transport, ER to cytosol                                                       | 5     | 8.76E-08 | DERL2,HERPUD1,HSP90B1,SEL1L,SYVN1                                                                                           |
| IRE1-mediated unfolded protein response                                                           | 6     | 1.39E-06 | DNAJB11,DNAJB9,HSPA5,HYOU1,PDIA6,SYVN1                                                                                      |
| cellular response to stress                                                                       | 16    | 4.51E-06 | AARS,ASNS,DDIT3,DERL2,DNAJB11,DNAJB9,HERPUD1,HSP90B1,HSPA5,HYOU1,PDIA4,PDIA6,SDF2L1,SELK,SYVN1,TRIB3                        |
| PERK-mediated unfolded protein response                                                           | 4     | 5.44E-06 | ASNS,DDIT3,HERPUD1,HSPA5                                                                                                    |
| ubiquitin-dependent protein catabolic process                                                     | 9     | 5.66E-05 | DDIT3,DERL2,DNAJB9,HERPUD1,HSP90B1,HSPA5,SDF2L1,SEL1L,SYVN1                                                                 |
| proteasome-mediated ubiquitin-dependent protein catabolic process                                 | 8     | 5.66E-05 | DDIT3,DERL2,DNAJB9,HSP90B1,HSPA5,SDF2L1,SEL1L,SYVN1                                                                         |
| response to stress                                                                                | 20    | 8.97E-05 | AARS,ANG,ASNS,DDIT3,DERL2,DNAJB11,DNAJB9,HERPUD1,HSP90B1,HSPA5,HYOU1,MANF,PDIA4,PDIA6,SDF2L1,SELK,SLC7A5,SLFN11,SYVN1,TRIB3 |
| regulation of endoplasmic reticulum stress-induced intrinsic apoptotic signaling pathway          | 4     | 0.00012  | DDIT3,HERPUD1,HYOU1,SYVN1                                                                                                   |
| cellular protein catabolic process                                                                | 9     | 0.000122 | DDIT3,DERL2,DNAJB9,HERPUD1,HSP90B1,HSPA5,SDF2L1,SEL1L,SYVN1                                                                 |
| negative regulation of response to endoplasmic reticulum stress                                   | 4     | 0.000171 | DERL2,HERPUD1,HYOU1,SYVN1                                                                                                   |
| ATF6-mediated unfolded protein response                                                           | 3     | 0.000294 | DDIT3,HSP90B1,HSPA5                                                                                                         |
| response to organic substance                                                                     | 16    | 0.000654 | AARS,ANG,DDIT3,DERL2,DNAJB11,DNAJB9,HERPUD1,HSP90B1,HSPA5,HYOU1,MANF,PDIA6,SDF2L1,SEL1L,SYVN1,TRIB3                         |
| protein folding                                                                                   | 6     | 0.000973 | AARS,DNAJB11,HSP90B1,HSPA5,PDIA4,PDIA6                                                                                      |
| negative regulation of endoplasmic reticulum stress-induced intrinsic apoptotic signaling pathway | 3     | 0.00174  | HERPUD1,HYOU1,SYVN1                                                                                                         |
| cell redox homeostasis                                                                            | 4     | 0.00267  | DDIT3,ERO1LB,PDIA4,PDIA6                                                                                                    |
| cellular response to organic substance                                                            | 13    | 0.00349  | AARS,DDIT3,DERL2,DNAJB11,DNAJB9,HERPUD1,HSP90B1,HSPA5,HYOU1,PDIA6,SDF2L1,SYVN1,TRIB3                                        |
| proteolysis                                                                                       | 10    | 0.00555  | DDIT3,DERL2,DNAJB9,ERO1LB,HERPUD1,HSP90B1,HSPA5,SDF2L1,SEL1L,SYVN1                                                          |
| ER-nucleus signaling pathway                                                                      | 3     | 0.0113   | ASNS,HERPUD1,HSP90B1                                                                                                        |
| intrinsic apoptotic signaling pathway in response to endoplasmic reticulum stress                 | 3     | 0.012    | DDIT3,SELK,TRIB3                                                                                                            |
| protein folding in endoplasmic reticulum                                                          | 2     | 0.0367   | HSP90B1,HSPA5                                                                                                               |

**Supplemental Table 3B. STRING-DB network analysis for biological process enrichment of Cluster 2 transcripts**

| Pathway                                         | Count | FDR      | Targets                                                                                                                                                                                     |
|-------------------------------------------------|-------|----------|---------------------------------------------------------------------------------------------------------------------------------------------------------------------------------------------|
| response to endoplasmic reticulum stress        | 14    | 1.39E-09 | ASNS,ATF4,ATP2A2,DNAJC10,EIF2AK3,FAM129A,FKBP14,GFPT1,PDIA5,SEC31A,SYVN1,UBA5,WFS1,WIP11                                                                                                    |
| endoplasmic reticulum unfolded protein response | 10    | 1.58E-07 | ASNS,ATF4,EIF2AK3,FKBP14,GFPT1,PDIA5,SEC31A,SYVN1,WFS1,WIP11                                                                                                                                |
| cellular response to unfolded protein           | 10    | 1.58E-07 | ASNS,ATF4,EIF2AK3,FKBP14,GFPT1,PDIA5,SEC31A,SYVN1,WFS1,WIP11                                                                                                                                |
| protein N-linked glycosylation via asparagine   | 10    | 2.87E-07 | GFPT1,MLEC,OSTC,PGM3,RPN1,SEC24D,SEC31A,ST6GALNAC4,SYVN1,UAP1                                                                                                                               |
| IRE1-mediated unfolded protein response         | 7     | 6.85E-06 | FKBP14,GFPT1,PDIA5,SEC31A,SYVN1,WFS1,WIP11                                                                                                                                                  |
| cellular response to stress                     | 22    | 0.000222 | ASNS,ATF4,ATP2A2,CISD2,DDIT4,DNAJC10,EIF2AK3,FAM129A,FKBP14,GFPT1,LARP1B,MSH2,PDIA5,RAD9A,SEC31A,SLC1A4,SYVN1,TMEM39A,UBA5,UBE2T,WFS1,WIP11                                                 |
| nucleotide-sugar biosynthetic process           | 4     | 0.000491 | GFPT1,PGM3,UAP1,UGDH                                                                                                                                                                        |
| single-organism carbohydrate metabolic process  | 13    | 0.000538 | ATF4,GFPT1,GOT1,MLEC,OSTC,PGM3,RPN1,SEC24D,SEC31A,ST6GALNAC4,SYVN1,UAP1,UGDH                                                                                                                |
| UDP-N-acetylglucosamine biosynthetic process    | 3     | 0.000599 | GFPT1,PGM3,UAP1                                                                                                                                                                             |
| glycoprotein biosynthetic process               | 10    | 0.00125  | GFPT1,MLEC,OSTC,PGM3,RPN1,SEC24D,SEC31A,ST6GALNAC4,SYVN1,UAP1                                                                                                                               |
| protein folding                                 | 8     | 0.00147  | DNAJC10,FKBP11,FKBP14,MLEC,PDIA5,PPIL1,TUBB3,WFS1                                                                                                                                           |
| carbohydrate metabolic process                  | 14    | 0.00158  | ATF4,GFPT1,GOT1,MLEC,OSTC,PGM3,RPN1,SEC24D,SEC31A,SLC3A2,ST6GALNAC4,SYVN1,UAP1,UGDH                                                                                                         |
| signal peptide processing                       | 3     | 0.00257  | SEC11C,SPCS2,SPCS3                                                                                                                                                                          |
| carbohydrate derivative biosynthetic process    | 12    | 0.00318  | GFPT1,MLEC,OSTC,PGM3,PIGA,RPN1,SEC24D,SEC31A,ST6GALNAC4,SYVN1,UAP1,UGDH                                                                                                                     |
| peptidyl-amino acid modification                | 14    | 0.00354  | EIF2AK3,FKBP11,FKBP14,GFPT1,MLEC,OSTC,PGM3,PPIL1,RPN1,SEC24D,SEC31A,ST6GALNAC4,SYVN1,UAP1                                                                                                   |
| ER-nucleus signaling pathway                    | 4     | 0.00416  | ASNS,ATF4,ATP2A2,WFS1                                                                                                                                                                       |
| amide biosynthetic process                      | 10    | 0.00416  | ASNS,C12orf65,CARS,EIF2AK3,MTHFD2,RPN1,SEC11C,SPCS2,SPCS3,TARS                                                                                                                              |
| post-translational protein modification         | 9     | 0.00416  | GFPT1,MLEC,PGM3,PIGA,RPN1,SEC24D,SEC31A,ST6GALNAC4,UAP1                                                                                                                                     |
| cellular protein metabolic process              | 29    | 0.00583  | APP,ASNS,ATF4,C12orf65,CARS,DNAJC10,FKBP11,FKBP14,GFPT1,MLEC,MTMR4,OSTC,PDIA5,PGM3,PIGA,PPIL1,RPN1,SEC24D,SEC31A,ST6GALNAC4,SYVN1,TARS,TRIM5,TUBB3,UAP1,UBA5,UBE2T,WFS1,WIP11               |
| PERK-mediated unfolded protein response         | 3     | 0.00685  | ASNS,ATF4,EIF2AK3                                                                                                                                                                           |
| single-organism metabolic process               | 32    | 0.0155   | ALDH1L2,ANG,APP,ASNS,ATF4,CARS,CISD2,DNAJC10,EIF2AK3,GFPT1,GPT2,MLEC,MSH2,MTFR1,MTHFD2,MTMR4,OSTC,PDIA5,PGM3,PIGA,RAD9A,RPN1,SEC24D,SEC31A,ST6GALNAC4,SYVN1,TARS,UAP1,UBE2T,UGDH,WFS1,WIP11 |
| glutamine transport                             | 2     | 0.0217   | SLC1A4,SLC1A5                                                                                                                                                                               |
| endoplasmic reticulum calcium ion homeostasis   | 3     | 0.0228   | APP,ATP2A2,WFS1                                                                                                                                                                             |
| translation                                     | 8     | 0.0274   | C12orf65,CARS,EIF2AK3,RPN1,SEC11C,SPCS2,SPCS3,TARS                                                                                                                                          |
| response to stress                              | 27    | 0.0464   | ANG,ASNS,ATF4,ATP2A2,CISD2,DDIT4,DNAJC10,EIF2AK3,FAM129A,FKBP14,GFPT1,HABP4,LARP1B,MSH2,PDIA5,RAD9A,SEC31A,SLC1A4,SLC3A2,SP140,SYVN1,TMEM39A,TRIM5,UBA5,UBE2T,WFS1,WIP11                    |

**Supplemental Table 3C. STRING-DB network analysis for biological process enrichment of Cluster 6 transcripts**

| Pathway                                                                            | Count | FDR      | Targets                                                                                                                                                                        |
|------------------------------------------------------------------------------------|-------|----------|--------------------------------------------------------------------------------------------------------------------------------------------------------------------------------|
| response to lipopolysaccharide                                                     | 10    | 6.73E-06 | ANKRD1,CYP27B1,IRAK2,NFKBIA,PDE4B,PEL1,PTGES,SERPINE1,TRIB1,ZC3H12A                                                                                                            |
| positive regulation of B cell proliferation                                        | 5     | 7.14E-05 | ADA,CD38,GPR183,PEL1,TNFRSF4                                                                                                                                                   |
| response to other organism                                                         | 12    | 7.14E-05 | ANKRD1,BATF,CYP27B1,IER3,IRAK2,NFKBIA,PDE4B,PEL1,PTGES,SERPINE1,TRIB1,ZC3H12A                                                                                                  |
| regulation of cell activation                                                      | 10    | 8.10E-05 | ADA,C1QTNF1,CD38,EBI3,GPR183,HSPH1,MERTK,PEL1,TNFRSF4,ZC3H12A                                                                                                                  |
| response to bacterium                                                              | 10    | 0.000127 | ANKRD1,CYP27B1,IRAK2,NFKBIA,PDE4B,PEL1,PTGES,SERPINE1,TRIB1,ZC3H12A                                                                                                            |
| regulation of leukocyte activation                                                 | 9     | 0.000275 | ADA,CD38,EBI3,GPR183,HSPH1,MERTK,PEL1,TNFRSF4,ZC3H12A                                                                                                                          |
| positive regulation of lymphocyte proliferation                                    | 6     | 0.000275 | ADA,CD38,EBI3,GPR183,PEL1,TNFRSF4                                                                                                                                              |
| response to external stimulus                                                      | 17    | 0.000287 | ADA,ANKRD1,BATF,CCL23,CCL4L2,CYP27B1,FPR1,FPR3,IER3,IRAK2,NFKBIA,PDE4B,PEL1,PTGES,SERPINE1,TRIB1,ZC3H12A                                                                       |
| cellular response to lipopolysaccharide                                            | 6     | 0.000484 | ANKRD1,IRAK2,NFKBIA,PDE4B,SERPINE1,ZC3H12A                                                                                                                                     |
| positive regulation of lymphocyte activation                                       | 7     | 0.000594 | ADA,CD38,EBI3,GPR183,HSPH1,PEL1,TNFRSF4                                                                                                                                        |
| negative regulation of sequence-specific DNA binding transcription factor activity | 6     | 0.000643 | IRAK2,NFKBIA,PEL1,TNFRSF4,TRIB1,ZC3H12A                                                                                                                                        |
| regulation of lymphocyte activation                                                | 8     | 0.000655 | ADA,CD38,EBI3,GPR183,HSPH1,MERTK,PEL1,TNFRSF4                                                                                                                                  |
| response to lipid                                                                  | 11    | 0.000753 | ANKRD1,CD38,CYP27B1,IRAK2,NFKBIA,PDE4B,PEL1,PTGES,SERPINE1,TRIB1,ZC3H12A                                                                                                       |
| regulation of cytokine production                                                  | 9     | 0.0013   | ALOX15B,EBI3,NFKBIA,PDE4B,PEL1,SERPINE1,TNFRSF4,TNFRSF9,ZC3H12A                                                                                                                |
| regulation of cell proliferation                                                   | 14    | 0.00138  | ADA,ALOX15B,CCL23,CD38,CYP27B1,EBI3,GPR183,NFKBIA,PEL1,PTGES,SLAMF1,TNFRSF4,TNFRSF9,TRIB1                                                                                      |
| regulation of localization                                                         | 17    | 0.0019   | ADA,ALOX15B,ANKRD1,C1QTNF1,CD38,CLIC2,HSPH1,IER3,MERTK,NFKBIA,PDE4B,SERPINE1,SLAMF1,TNFRSF4,TNFRSF9,TRIB1,ZC3H12A                                                              |
| cellular response to zinc ion                                                      | 3     | 0.00324  | MT1G,MT1H,MT1M                                                                                                                                                                 |
| negative regulation of biological process                                          | 23    | 0.00336  | ALOX15B,ANKRD1,C1QTNF1,CCL23,CLIC2,CYP27B1,DNAJA4,GPR132,HSPH1,IRAK2,LIMA1,MERTK,MT1G,MT1H,MT1M,NFKBIA,PDE4B,PEL1,PTGES,SERPINE1,TNFRSF4,TRIB1,ZC3H12A                         |
| negative regulation of multicellular organismal process                            | 11    | 0.00336  | ADA,C1QTNF1,CD38,FKBP4,NFKBIA,PDE4B,SERPINE1,TNFRSF4,TNFRSF9,TRIB1,ZC3H12A                                                                                                     |
| defense response                                                                   | 13    | 0.00353  | BATF,CCL23,CCL4L2,CD163,CHST2,CYP27B1,IRAK2,NFKBIA,PEL1,PTGES,RNF19B,SERPINE1,TNFRSF4                                                                                          |
| positive regulation of immune system process                                       | 10    | 0.00477  | ADA,CD38,EBI3,GPR183,HSPH1,IRAK2,PDE4B,SERPINE1,TNFRSF4,TRIB1                                                                                                                  |
| multi-organism process                                                             | 16    | 0.00503  | ANKRD1,BATF,CD38,CYP27B1,FKBP4,IER3,IRAK2,MERTK,NFKBIA,PDE4B,PEL1,PTGES,SERPINE1,SLAMF1,TRIB1,ZC3H12A                                                                          |
| response to stress                                                                 | 20    | 0.00588  | ANKRD1,BATF,CCL23,CCL4L2,CD163,CD38,CHST2,CYP27B1,DNAJA4,FKBP4,HSPH1,IER3,IRAK2,NFKBIA,PEL1,PTGES,RNF19B,SERPINE1,TNFRSF4,TRIB1                                                |
| regulation of transport                                                            | 14    | 0.00588  | ADA,ALOX15B,ANKRD1,C1QTNF1,CD38,CLIC2,IER3,MERTK,NFKBIA,PDE4B,SERPINE1,SLAMF1,TNFRSF4,TNFRSF9                                                                                  |
| negative regulation of NF-kappaB transcription factor activity                     | 4     | 0.00642  | IRAK2,NFKBIA,PEL1,ZC3H12A                                                                                                                                                      |
| regulation of sequence-specific DNA binding transcription factor activity          | 7     | 0.00642  | IRAK2,NFKBIA,PEL1,TNFRSF4,TRAF1,TRIB1,ZC3H12A                                                                                                                                  |
| cellular response to stimulus                                                      | 27    | 0.00642  | ANKRD1,BATF,CCL23,CCL4L2,CD38,CLIC2,CYP27B1,EBI3,FPR1,FPR3,GPR132,GPR183,HSPH1,IER3,IRAK2,MT1G,MT1H,MT1M,NFKBIA,PDE4B,PTGES,SERPINE1,SLAMF1,TNFRSF4,TRAF1,TRIB1,ZC3H12A        |
| immune response                                                                    | 12    | 0.00784  | ADA,BATF,CCL23,CCL4L2,CYP27B1,EBI3,GPR183,IRAK2,NFKBIA,PEL1,RNF19B,TNFRSF4                                                                                                     |
| response to oxygen-containing compound                                             | 12    | 0.00839  | ADA,ANKRD1,CD38,CYP27B1,IRAK2,NFKBIA,PDE4B,PEL1,PTGES,SERPINE1,TRIB1,ZC3H12A                                                                                                   |
| leukocyte activation                                                               | 7     | 0.00922  | BATF,EBI3,GPR183,MERTK,MT1G,SLAMF1,TNFRSF4                                                                                                                                     |
| regulation of immune system process                                                | 12    | 0.00981  | ADA,CD38,EBI3,GPR183,HSPH1,IRAK2,MERTK,PDE4B,SERPINE1,TNFRSF4,TRIB1,ZC3H12A                                                                                                    |
| inflammatory response                                                              | 7     | 0.015    | CCL23,CCL4L2,CD163,CHST2,IRAK2,PTGES,TNFRSF4                                                                                                                                   |
| B cell activation involved in immune response                                      | 3     | 0.0166   | ADA,BATF,GPR183                                                                                                                                                                |
| response to chemical                                                               | 20    | 0.0166   | ADA,ANKRD1,CCL23,CCL4L2,CYP27B1,EBI3,FPR1,FPR3,HSPH1,IRAK2,MT1G,MT1H,MT1M,PDE4B,PEL1,PTGES,SERPINE1,TNFRSF4,TRIB1,ZC3H12A                                                      |
| cell activation                                                                    | 8     | 0.0219   | BATF,EBI3,GPR183,MERTK,MT1G,SERPINE1,SLAMF1,TNFRSF4                                                                                                                            |
| lymphocyte activation                                                              | 6     | 0.0263   | BATF,EBI3,GPR183,MERTK,SLAMF1,TNFRSF4                                                                                                                                          |
| response to stimulus                                                               | 28    | 0.0263   | ANKRD1,BATF,CCL23,CCL4L2,CD163,CHST2,CLIC2,CYP27B1,DNAJA4,EBI3,FPR1,FPR3,GPR132,GPR183,HSPH1,IER3,IRAK2,MT1G,MT1H,MT1M,NFKBIA,PDE4B,RNF19B,SERPINE1,SLAMF1,TRAF1,TRIB1,ZC3H12A |
| regulation of multicellular organismal process                                     | 15    | 0.03     | ADA,ANKRD1,C1QTNF1,CD38,CLIC2,CYP27B1,EBI3,FKBP4,PDE4B,PEL1,SERPINE1,TNFRSF4,TNFRSF9,TRIB1,ZC3H12A                                                                             |
| negative regulation of molecular function                                          | 10    | 0.0331   | CCL23,CLIC2,CYP27B1,IRAK2,NFKBIA,PEL1,SERPINE1,TNFRSF4,TRIB1,ZC3H12A                                                                                                           |
| regulation of molecular function                                                   | 16    | 0.0347   | ARHGEF10L,CCL23,CLIC2,CYP27B1,FPR1,HSPH1,IRAK2,NFKBIA,PDE4B,PEL1,SERPINE1,SLAMF1,TNFRSF4,TRAF1,TRIB1,ZC3H12A                                                                   |
| positive regulation of multicellular organismal process                            | 11    | 0.0377   | ADA,ANKRD1,C1QTNF1,CD38,CYP27B1,EBI3,NFKBIA,PDE4B,PEL1,SERPINE1,TRIB1                                                                                                          |
| positive regulation of cytokine production                                         | 6     | 0.0393   | ALOX15B,EBI3,NFKBIA,PDE4B,PEL1,SERPINE1                                                                                                                                        |
| negative regulation of growth                                                      | 5     | 0.0393   | ALOX15B,CYP27B1,MT1G,MT1H,MT1M                                                                                                                                                 |
| negative regulation of immune system process                                       | 6     | 0.041    | ADA,MERTK,NFKBIA,PEL1,TRIB1,ZC3H12A                                                                                                                                            |
| positive regulation of alpha-beta T cell activation                                | 3     | 0.041    | ADA,EBI3,HSPH1                                                                                                                                                                 |
| response to organic substance                                                      | 15    | 0.0423   | ADA,ANKRD1,CD38,CYP27B1,EBI3,HSPH1,IRAK2,MT1G,PDE4B,PEL1,PTGES,SERPINE1,TNFRSF4,TRIB1,ZC3H12A                                                                                  |
| mature B cell differentiation involved in immune response                          | 2     | 0.0449   | ADA,GPR183                                                                                                                                                                     |





|   |                                                                                                                  |     |          |                                                                                                                                                                                                                                                                                                                                                                                                                                                                                                                                                                                                                                                                                                                                                                                                                                                                                                                                                                   |
|---|------------------------------------------------------------------------------------------------------------------|-----|----------|-------------------------------------------------------------------------------------------------------------------------------------------------------------------------------------------------------------------------------------------------------------------------------------------------------------------------------------------------------------------------------------------------------------------------------------------------------------------------------------------------------------------------------------------------------------------------------------------------------------------------------------------------------------------------------------------------------------------------------------------------------------------------------------------------------------------------------------------------------------------------------------------------------------------------------------------------------------------|
| 4 | single-organism localization                                                                                     | 74  | 0.000839 | ABAT,ADA,ALDH5A1,APP,ASN1,ATP1B1,ATP2A2,CALR,CD36,CLIC2,CTNNB1,CTNS,CYB561,CYP27B1,DDIT3,DERL2,FABP6,FKBPA,GABARAPL2,GABRE,HABP4,HERPUD1,HIAT1,HS<br>P90B1,HSP9A5,KONK6,KIAA1033,KIAA1279,KPNA2,LIN7C,MERTK,MFS2DA,MSTO1,NFKBIA,NPL,OC4,PDIA4,PNP,RNF198,RP1,RPN1,RTPA,SEC11C,SEC24D,SEC31A,SEL,IL,SEK,SE<br>LT,SERPINE1,SLC17A9,SLC1A4,SLC1A5,SLC22A16,SLC28A6,SLC36B1,SLC39A14,SLC3A2,SLC7A1,SLC7A5,SPCS2,SPCS3,SRSF11,SRSF3,SYVN1,TMEM88B,TOB1,TOPORS<br>UFDL1,UOQRH,VPS26A,WVF,WFS1,WIP1,XCR1                                                                                                                                                                                                                                                                                                                                                                                                                                                                 |
| 4 | establishment of localization in cell                                                                            | 50  | 0.000925 | ABAT,ALDH5A1,ANP32A,APP,ATP1B1,ATP2A2,CALR,CD36,CTNNB1,DDIT3,DERL2,EIF2AK3,GABARAPL2,HABP4,HERPUD1,HSP90B1,HSP9A5,KIAA1033,KIAA1279,KPNA2,LIN7C,MERT<br>K,NFKBIA,NPL,OC4,PDIA4,PNP,RNF198,RP1,RPN1,RTPA,SAR1A,SEC11C,SEC31A,SEL,IL,SELT,SERPINE1,SLI,SLC17A9,SPCS2,SPCS3,SRSF11,SRSF3,SYVN1,TOB1,UFDL1,VPS26<br>A,WVF,WFS1,WIP1,XCR1                                                                                                                                                                                                                                                                                                                                                                                                                                                                                                                                                                                                                              |
| 1 | protein peptidyl-prolyl isomerization                                                                            | 7   | 0.000938 | FKBP11,FKBP14,FKBP2,FKBP4,FKBP5,PRIG,PP1L1                                                                                                                                                                                                                                                                                                                                                                                                                                                                                                                                                                                                                                                                                                                                                                                                                                                                                                                        |
| 1 | transport                                                                                                        | 80  | 0.001    | ABAT,ADA,ALDH5A1,ANP32A,APP,ASN1,ATP1B1,ATP2A2,CALR,CD163,CD36,CLIC2,CTNNB1,CTNS,CYB561,CYP27B1,DDIT3,DERL2,DYNCL11,FABP5,FKBP4,G3BP1,GABARAPL2,H<br>ABP4,HERPUD1,HIAT1,HSP90B1,HSPH1,HYOU1,KONK6,KIAA1033,KIAA1279,LIN7C,LTY75,MERTK,MFS2DA,NFKBIA,NPL,OC4,PDIA4,PNP,RNF198,RP1,RPN1,RTPA,SAR1A,SEC11C,<br>EC31A,SEL,IL,SEK,SELT,SERPINE1,SLI,SLC10A7,SLC17A9,SLC1A4,SLC1A5,SLC22A16,SLC26A6,SLC35B1,SLC39A14,SLC3A2,SLC7A1,SLC7A5,SPCS2,SPCS3,SRSF11,SRSF3,SYV<br>N1,TCPI1,TMED7,TMEM88B,TOB1,TRAM2,UFDL1,UOQRH,VPS26A,WVF,WFS1,WIP1,XCR1                                                                                                                                                                                                                                                                                                                                                                                                                       |
| 1 | nucleotide-sugar biosynthetic process                                                                            | 5   | 0.00117  | GFPT1,GMIPBP,PGM3,UAP1,UGDH                                                                                                                                                                                                                                                                                                                                                                                                                                                                                                                                                                                                                                                                                                                                                                                                                                                                                                                                       |
| 1 | protein folding in endoplasmic reticulum                                                                         | 4   | 0.00129  | CALR,DNAJC10,HSP90B1,HSP9A5                                                                                                                                                                                                                                                                                                                                                                                                                                                                                                                                                                                                                                                                                                                                                                                                                                                                                                                                       |
| 4 | negative regulation of biological process                                                                        | 93  | 0.00153  | AARS,ACPS,ALOX15B,ANG,ANKRD1,ASNS,ATP2A2,BANP,BC12A1,C1D,C10,TNF1,CALR,CAP2A1,CAST,CCL23,CD164,CD276,CD36,CLIC2,CTNNB1,CTR9,CYP27B1,DDIT3,DERL2,DNA<br>JA4,DNAJB5,DNAJC10,DUSP6,DYRK2,EBI6,EV,FAI,MT29A,FGD,G3BP1,GABARAPL2,GADD45GIP1,GRR132,HMG81,HRSPT2,HSP90B1,HSPH1,HTRA2,IKAK2,KLF4,LLGA,LIAMA1,LYPL<br>A1,MAF,MEZD1,MERTK,METRN,MSH2,MTG,MT1H,MT,MTM,MTMR4,NFKBIA,NFKL1,PC,PDE4B,PEL1,PKCZIP1,PMI2,PPP1CB,PPP1R15B,PSMCG,PTGES,RAD9A,RAPIB,RGSS2,RTKN,S<br>ARIA,SEMA3A,SERPINE1,SERTAD3,SLFN11,SPOCD1,SUMO1,SYVN1,TAF9,TD2,TEJ5,TNFRSF4,TNFSF10,TOPORS,TRIB1,TRIB3,TRIM5,UBXN1,VSX2,WFS1,XCR1,ZC3H12A                                                                                                                                                                                                                                                                                                                                                      |
| 1 | cell redox homeostasis                                                                                           | 8   | 0.00175  | DDIT3,DNAJC10,EROC11B,GOLC,PDIA4,PDIA6,PDIA6,SELT                                                                                                                                                                                                                                                                                                                                                                                                                                                                                                                                                                                                                                                                                                                                                                                                                                                                                                                 |
| 4 | localization                                                                                                     | 4   | 0.00214  | CALR,DDIT3,HSP90B1,HSP9A5                                                                                                                                                                                                                                                                                                                                                                                                                                                                                                                                                                                                                                                                                                                                                                                                                                                                                                                                         |
| 1 | ATF6-mediated unfolded protein response                                                                          | 93  | 0.00255  | ABAT,ADA,ALDH5A1,ANG,ANP32A,APP,ASN1,ATP1B1,ATP2A2,BANP,CALR,CCL23,CCL4L2,CD163,CD36,CLIC2,CTNNB1,CTNS,CYB561,CYP27B1,DDIT3,DDIT4,DERL2,DYNCL11,FAB<br>P5,FKBP4,G3BP1,GABARAPL2,HABP4,HERPUD1,HIAT1,HMG81,HSP90B1,HSPH1,HIYOU1,KONK6,KIAA1033,KIAA1279,LIN7C,LTY75,MATK,MERTK,MFS2DA,MSTO1,NFKBIA,NPL,OC4,P<br>DE4B,PDIA4,PNP,PTPIP2,PNP19B,ROCK1,RP1,RPN1,RTPA,SAR1A,SEC11C,SEC31A,SEL,IL,SEK,SELT,SEMA3A,SERPINE1,SLI,SLC10A7,SLC17A9,SLC1A4,SLC1A5,SLC22A16,S<br>LC26A6,SLC35B1,SLC39A14,SLC3A2,SLC7A1,SLC26A6,SPCS2,SPCS3,SRSF11,SRSF3,SYVN1,TCPI1,TMED7,TMEM88B,TOB1,TOPORS,TRAM2,UFDL1,UOQRH,VPS26A,WVF,WFS1,WIP<br>11,XCR1                                                                                                                                                                                                                                                                                                                                 |
| 3 | intrinsic apoptotic signaling pathway                                                                            | 12  | 0.00255  | ADIT4,BCL2A1,DDIT3,DDIT4,DNAJC10,DYRK2,EIF2AK3,HTRA2,IER3,MSH2,SELT,TRIB3                                                                                                                                                                                                                                                                                                                                                                                                                                                                                                                                                                                                                                                                                                                                                                                                                                                                                         |
| 1 | negative regulation of sequence-specific DNA binding                                                             | 11  | 0.00261  | DDIT3,DDIT4,IRAK2,KLF4,NFKBIA,PEL1,SUMO1,TNFRSF4,TRIB1,WFS1,ZC3H12A                                                                                                                                                                                                                                                                                                                                                                                                                                                                                                                                                                                                                                                                                                                                                                                                                                                                                               |
| 1 | transcription factor activity                                                                                    | 6   | 0.00261  | ATF4,DDIT3,DNAJC10,EIF2AK3,SELT,TRIB3                                                                                                                                                                                                                                                                                                                                                                                                                                                                                                                                                                                                                                                                                                                                                                                                                                                                                                                             |
| 3 | intrinsic apoptotic signaling pathway in response to endoplasmic reticulum stress                                | 41  | 0.00262  | AARS,ADA,ALK,ANKRD1,ASNS,ATP2A2,BCL2A1,BEY2,CALR,CAST,CD38,CTNNB1,DDIT3,DUSP6,GF15,HMG81,HSP90B1,HSP9A5,HSPH1,HTRA2,KLF4,LLGA,LIAMA1,LYPL<br>A1,MAF,MEZD1,MERTK,METRN,MSH2,MTG,MT1H,MT,MTM,MTMR4,NFKBIA,NFKL1,PC,PDE4B,PEL1,PKCZIP1,PMI2,PPP1CB,PPP1R15B,PSMCG,PTGES,RAD9A,RAPIB,RGSS2,RTKN,S<br>ARIA,SEMA3A,SERPINE1,SERTAD3,SLFN11,SPOCD1,SUMO1,SYVN1,TAF9,TD2,TEJ5,TNFRSF4,TNFSF10,TOPORS,TRIB1,TRIB3,TRIM5,UBXN1,VSX2,WFS1,XCR1,ZC3H12A                                                                                                                                                                                                                                                                                                                                                                                                                                                                                                                       |
| 3 | regulation of apoptotic process                                                                                  | 30  | 0.00292  | ALG13,ALK,CALR,CTR9,DYRK2,EIF2AK3,FKBP11,FKBP14,SYVN1,TAF9,TCPI1,TNFRSF4,TNFSF10,TOPORS,TRAFF1,WFS1                                                                                                                                                                                                                                                                                                                                                                                                                                                                                                                                                                                                                                                                                                                                                                                                                                                               |
| 1 | peptidyl-amino acid modification                                                                                 | 17  | 0.00294  | AARS,ADH1,ALDH1L2,ALDH5A1,ASNS,ATP4,CARS,CTNS,DYPD,EROC11B,GOLC,GFPT1,GP2,PSAT1,SLC7A6,TARS,UPIB1                                                                                                                                                                                                                                                                                                                                                                                                                                                                                                                                                                                                                                                                                                                                                                                                                                                                 |
| 4 | cellular amino acid metabolic process                                                                            | 26  | 0.0042   | ACPS,ANKRD1,BATF,CD36,CTR9,CYP27B1,DDIT3,DDIT4,EIF2AK3,HSP9A5,IER3,IRAK2,NFKBIA,PDE4B,PEL1,PMI2,PPP1R15B,PTGES,SERPINE1,SLFN11,TLR1,TMEM81,TRIB1,TRIM5,<br>WFS1,ZC3H12A                                                                                                                                                                                                                                                                                                                                                                                                                                                                                                                                                                                                                                                                                                                                                                                           |
| 4 | cellular localization                                                                                            | 54  | 0.00461  | ABAT,ALDH5A1,ANP32A,APP,ASN1,ATP1B1,ATP2A2,BANP,CALR,CD36,CTNNB1,DDIT3,DERL2,EIF2AK3,GABARAPL2,HABP4,HERPUD1,HSP90B1,HSP9A5,KIAA1033,KIAA1279,KPNA2,<br>LIN7C,MERTK,MSTO1,NFKBIA,NPL,OC4,PDIA4,PNP,RNF198,RP1,RPN1,RTPA,SAR1A,SEC11C,SEC31A,SEL,IL,SELT,SERPINE1,SLI,SLC17A9,SPCS2,SPCS3,SRSF11,SRSF3,SYVN1<br>TOB1,TOPORS,UFDL1,VPS26A,WVF,WFS1,WIP1,XCR1                                                                                                                                                                                                                                                                                                                                                                                                                                                                                                                                                                                                        |
| 3 | regulation of cell death                                                                                         | 42  | 0.00471  | AARS,ADA,ALK,ANKRD1,ASNS,ATP2A2,BCL2A1,BEY2,CALR,CAST,CD38,CTNNB1,DDIT3,DDIT4,DUSP6,GF15,HMG81,HSP90B1,HSP9A5,HSPH1,HTRA2,KLF4,LLGA,MERTK,MSH2,N<br>FKBIA,PMI2,PPP1CB,PSMCG,RAD9A,ROCK1,SDZL1,SERPINE1,SYVN1,TAF9,TCPI1,TNFRSF4,TNFSF10,TOPORS,TRAFF1,WFS1                                                                                                                                                                                                                                                                                                                                                                                                                                                                                                                                                                                                                                                                                                        |
| 1 | cellular amino acid biosynthetic process                                                                         | 8   | 0.00499  | ABAT,ADH1,ASNS,DYPD,GP2,MTM,PSAT1,UPIB1                                                                                                                                                                                                                                                                                                                                                                                                                                                                                                                                                                                                                                                                                                                                                                                                                                                                                                                           |
| 4 | negative regulation of cellular process                                                                          | 85  | 0.00601  | AARS,ACPS,ALOX15B,ANG,ANKRD1,ASNS,ATP4,BCL2A1,C1D,C10,TNF1,CALR,CAP2A1,CAST,CCL23,CD164,CD276,CD36,CLIC2,CTNNB1,CTR9,CYP27B1,DDIT3,DERL2,DNAJA4,DNA<br>JB5,DNAJC10,DUSP6,DYRK2,EBI6,EV,FAI,MT29A,G3BP1,GABARAPL2,GADD45GIP1,GRR132,HMG81,HRSPT2,HSP90B1,HSPH1,HTRA2,IKAK2,KLF4,LLGA,LIAMA1,LYPLA,MAF,MEZD1<br>MERTK,MSH2,MTM,MTG,MT1H,MT,MTM,MTMR4,NFKBIA,NFKL1,PC,PDE4B,PEL1,PKCZIP1,PMI2,PPP1CB,PPP1R15B,PSMCG,PTGES,RAD9A,RAPIB,RGSS2,RTKN,SARIA,SEMA3A,SERPINE1,<br>SERTAD3,SLFN11,SPOCD1,SUMO1,SYVN1,TAF9,TD2,TEJ5,TNFRSF4,TNFSF10,TOPORS,TRIB1,TRIB3,TRIM5,UBXN1,VSX2,WFS1,XCR1,ZC3H12A                                                                                                                                                                                                                                                                                                                                                                     |
| 1 | positive regulation of transcription from RNA polymerase II promoter in response to endoplasmic reticulum stress | 4   | 0.00605  | ATF3,ATF4,DDIT3,HSPA5                                                                                                                                                                                                                                                                                                                                                                                                                                                                                                                                                                                                                                                                                                                                                                                                                                                                                                                                             |
| 1 | single-organism carbohydrate metabolic process                                                                   | 23  | 0.00637  | ALDH5A1,ATF3,ATF4,B3GNT5,CALR,EXH1,FABP5,GOLC,GFPT1,GMIPBP,GOI1,MLE,EC,OSTC,PC,PGM3,PPP1CB,RPN1,SEC24D,SEC31A,STRGAL,NAOC,SYVN1,UAP1,UGDH                                                                                                                                                                                                                                                                                                                                                                                                                                                                                                                                                                                                                                                                                                                                                                                                                         |
| 4 | cellular metabolic process                                                                                       | 152 | 0.00679  | ACPS,ADH1,AGPAT9,ALDH1L2,ALK,ANG,ANKRD1,ANP32A,APP,ASN1,ASNS,ATF3,ATP2A2,ATMIN,ATXN3,B3GNT5,BANP,BCAS2,C12orf86,C1D,CALR,CARS,CD36,CHSTZ,CISD2,COM<br>MDS,CTNNB1,CTNS,CTR9,CYB561,CYP27B1,CYP9A1,DDIT3,DDX17,DERL2,DNAJA4,DNAJB5,DNAJB9,DNAJC10,DPYD,DTX3L,DUSP6,DYRK2,EEF1B2,EPHD1,ELOVL6,EXH1,FANCF,<br>FGD,FKBP11,FKBP14,FKBP2,FKBP4,FKBP5,G3BP1,GABARAPL2,GADD45GIP1,GFPT1,GMIPBP,GND4,GNNG10,GP2,HABP4,HMG81,HRSPT2,HSP90B1,HSP9A5,HSPH1,HIYOU1,JD2,IRA<br>K2,KLF4,KPNA2,LLGA,LMOC4,MAK7,MENL2,ME3,MERTK,MLEC,MSH2,MTFTR1,MTM,MTMR4,NFKBIA,NFKL1,NPL,OC4,OSTC,PDE4B,PDIA4,PDIA6,PDIA6,PEL1,PFNA2,PIA4,<br>M2,PNP,PP1G,PLL1,PPP1CB,PRPF4B,PSAT1,PSMCG,PTGES,PTMA,RNASEH4,RNF198,ROCK1,RP1,RPN1,SDZL1,SEC24D,SEC31A,SEL,IL,SELT,SERPINE1,SERTAD3,SLI,<br>SLC7A5,SPOCD1,SRSF11,SRSF3,STRGAL,NAOC,SUMO1,SYVN1,TAF9,TARS,TCPI1,TD2,TOPORS,TRIB1,TRIM5,TSN,TUBA3D,TUBB3,UAP1,UBA5,UBE2T,UBXN1,UFDL1,UGDH,UPIB1,U<br>SPI8,VSX2,WFS1,WIP1,WTPA,ZC3H12A,ZNF396,ZNF788 |
| 1 | positive regulation of proteasomal protein catabolic process                                                     | 8   | 0.00679  | ATXN3,GOLC,HERPUD1,PSMCG,SUMO1,TRIB1,TRIB3,ZFAND2A                                                                                                                                                                                                                                                                                                                                                                                                                                                                                                                                                                                                                                                                                                                                                                                                                                                                                                                |

|   |                                                                                                     |     |         |                                                                                                                                                                                                                                                                                                                                                                                                                                                                                                                                                                                                                                                                                                                                                                                                                                                                                                                                                                                                                                                                                                                                                                                                                                                                                                                                                                                       |
|---|-----------------------------------------------------------------------------------------------------|-----|---------|---------------------------------------------------------------------------------------------------------------------------------------------------------------------------------------------------------------------------------------------------------------------------------------------------------------------------------------------------------------------------------------------------------------------------------------------------------------------------------------------------------------------------------------------------------------------------------------------------------------------------------------------------------------------------------------------------------------------------------------------------------------------------------------------------------------------------------------------------------------------------------------------------------------------------------------------------------------------------------------------------------------------------------------------------------------------------------------------------------------------------------------------------------------------------------------------------------------------------------------------------------------------------------------------------------------------------------------------------------------------------------------|
| 1 | ubiquitin-dependent protein catabolic process                                                       | 19  | 0.00715 | ATXN3,DDIT3,DERL2,DNAJB9,DNAJC10,HERPUD1,HSP90B1,HSPA6,NIP1,LOC4,PPP2C8,PSM06,SDF2L1,SEL,IL,SYVN1,TOFOR5,UBXN1,UFD1L,USP18,WFS1                                                                                                                                                                                                                                                                                                                                                                                                                                                                                                                                                                                                                                                                                                                                                                                                                                                                                                                                                                                                                                                                                                                                                                                                                                                       |
| 4 | organic substance transport                                                                         | 49  | 0.00742 | ADA,ATP1B1,CALR,CD36,CTNS,DERL2,EIF2AK3,FAPB5,GABARAPL2,HERPUD1,HSP90B1,KIAA1033,LIN7C,MESD2A,NFKBIA,NIP1,LOC4,PDIA4,PNP,RNF198,RPLP1,RTTP4,SAR1A,SEC11C,SEC24D,SEC31A,SEL,IL,SELT,SIL1,SLC14A,SLC14A5,SLC22A1,6,SLC28A6,SLC35B1,SLC3A2,SLC37A1,SLC7A5,SFPCS2,SFPCS3,SRSF11,SRSF3,SYVN1,TCPI1,TMED7,TOB1,TRAM2,UFD1L,VPS28A,WFS1                                                                                                                                                                                                                                                                                                                                                                                                                                                                                                                                                                                                                                                                                                                                                                                                                                                                                                                                                                                                                                                      |
| 1 | UDP-N-acetylglucosamine biosynthetic process                                                        | 3   | 0.00768 | GFP11,PGM3,UAP1                                                                                                                                                                                                                                                                                                                                                                                                                                                                                                                                                                                                                                                                                                                                                                                                                                                                                                                                                                                                                                                                                                                                                                                                                                                                                                                                                                       |
| 1 | protein glycosylation                                                                               | 15  | 0.00811 | ALG13,B3GNT5,CALR,EXT1,GFP11,GMPPE,MLEC,OSTC,PGM8,RPN1,SEC24D,SEC31A,STREGALNAQC,SYVN1,UAP1                                                                                                                                                                                                                                                                                                                                                                                                                                                                                                                                                                                                                                                                                                                                                                                                                                                                                                                                                                                                                                                                                                                                                                                                                                                                                           |
| 1 | regulation of binding                                                                               | 14  | 0.00899 | APP,CC23,CLC2,DDIT3,EIF2AK3,HABP4,HERPUD1,HMG81,HSPA5,DI2,NFKBIA,ROCK1,SUMO1,TRIB3                                                                                                                                                                                                                                                                                                                                                                                                                                                                                                                                                                                                                                                                                                                                                                                                                                                                                                                                                                                                                                                                                                                                                                                                                                                                                                    |
| 3 | programmed cell death                                                                               | 33  | 0.0101  | AFOX15B,APP,ATF4,BCL2A1,BEEX2,C10,CD38,CTNNB1,DDIT3,DDI1,DNAJC10,DYRK2,GQLC,HERPUD1,HMG81,HTRA2,KLF4,LUG4,MSH2,NFKBIA,PIW2,PPP2C8,PSM06,ROCK1,RTKN,SELK,SEMA3A,TNFRSF4,TNFRSF9,TNFSF10,TRAF1,TRIB3,ZC3H12A                                                                                                                                                                                                                                                                                                                                                                                                                                                                                                                                                                                                                                                                                                                                                                                                                                                                                                                                                                                                                                                                                                                                                                            |
| 4 | cellular macromolecule metabolic process                                                            | 127 | 0.0101  | ALG13,ALK,ANG,ANKRD1,APP,ASNA1,ASNS,ATF3,ATF7IP2,ATMIN,ATXN3,B3GNT5,BANP,BCAS2,C12orf65,C1D,CALR,CARS,COMMDD,CTNNB1,CTR9,DDIT3,DDI1,DDX17,DERL2,DNAJ4,DNAJB5,DNAJB9,DNAJC10,DTX3L,DUSP6,DYRK2,EEF1B2,EEP1,EXT1,FANCF,FICD,FKBP14,FKBP14,FKBP2,FKBP4,FKBP5,GADD45G1P1,GFP11,GMPPE,HABP4,HMG81,1,HRS,P12,HSP90B1,HSPA5,HSPH1,HTRA2,HYOU1,DI2,IKK2,KLF4,KPN2A2,LGAL,LMOD4,LYPL1,1,MATK,MBNL1,MERTK,MLEC,MSH2,MTMR4,NFXL1,NIP1,LOC4,OSTC,PDIA4,PDIA5,PDIA6,PEL1,1,PEN2,PGM3,PIGA,PIW2,PIPG,PPL1,PPP1CB,PPP4B,PSM06,PTMA,RAO9A,RNASEH4,RNF198,ROCK1,RPLP1,RPNI,SPZL1,SEC24D,SEC31A,SEL,IL,SELT,SERPINE1,SERTAD3,SIL1,SPOCD1,SRSF11,SRSF3,STREGALNAQC,SUMO1,SYVN1,TAJ9,TAJ9,TCPI1,TOBP2,TOFOR5,TRIB1,TRIB3,TRIM5,TSN,TUBA3D,TUBB8,UAP1,UBA5,UBE2T,UBXN1,UFD1L,USP18,V5X2,WFS1,WIP1,WIPAP,ZNF395,ZNF788                                                                                                                                                                                                                                                                                                                                                                                                                                                                                                                                                                                      |
| 3 | 1 regulation of endoplasmic reticulum stress-induced intrinsic apoptotic signaling pathway          | 5   | 0.0105  | DDIT3,HERPUD1,HYOU1,SYVN1,WFS1                                                                                                                                                                                                                                                                                                                                                                                                                                                                                                                                                                                                                                                                                                                                                                                                                                                                                                                                                                                                                                                                                                                                                                                                                                                                                                                                                        |
| 4 | cytoplasmic transport                                                                               | 25  | 0.0113  | ANP32A,ATP2A2,CALR,DDIT3,DERL2,HERPUD1,HSP90B1,KPNA2,NFKBIA,NIP1,OC4,RPLP1,RPN1,SEC11C,SEC24D,SEC31A,SEL,IL,SPCS2,SFPCS3,SRSF11,SRSF3,SYVN1,TOB1,UFD1L,WIP1,XCR1                                                                                                                                                                                                                                                                                                                                                                                                                                                                                                                                                                                                                                                                                                                                                                                                                                                                                                                                                                                                                                                                                                                                                                                                                      |
| 1 | cellular protein catabolic process                                                                  | 20  | 0.0131  | ATXN3,DDIT3,DERL2,DNAJB9,DNAJC10,HERPUD1,HSP90B1,HSPA6,HTRA2,NIP1,LOC4,PPP2C8,PSM06,SDF2L1,SEL,IL,SYVN1,TOFOR5,UBXN1,UFD1L,USP18,WFS1                                                                                                                                                                                                                                                                                                                                                                                                                                                                                                                                                                                                                                                                                                                                                                                                                                                                                                                                                                                                                                                                                                                                                                                                                                                 |
| 3 | regulation of apoptotic signaling pathway                                                           | 17  | 0.0137  | ATF3,BCL2A1,CTNNB1,DDIT3,GQLC,HERPUD1,HSPH1,HTRA2,IER3,PPP1CB,RAD9A,SERPINE1,SYVN1,TAJ9,TNFSF10,TRAF1,WFS1                                                                                                                                                                                                                                                                                                                                                                                                                                                                                                                                                                                                                                                                                                                                                                                                                                                                                                                                                                                                                                                                                                                                                                                                                                                                            |
| 1 | positive regulation of proteasomal ubiquitin-dependent protein catabolic process                    | 7   | 0.0163  | ATXN3,GQLC,HERPUD1,SUMO1,TRIB1,TRIB3,ZFAND2A                                                                                                                                                                                                                                                                                                                                                                                                                                                                                                                                                                                                                                                                                                                                                                                                                                                                                                                                                                                                                                                                                                                                                                                                                                                                                                                                          |
| 3 | 1 negative regulation of endoplasmic reticulum stress-induced intrinsic apoptotic signaling pathway | 4   | 0.0163  | HERPUD1,HYOU1,SYVN1,WFS1                                                                                                                                                                                                                                                                                                                                                                                                                                                                                                                                                                                                                                                                                                                                                                                                                                                                                                                                                                                                                                                                                                                                                                                                                                                                                                                                                              |
| 1 | negative regulation of response to endoplasmic reticulum stress                                     | 5   | 0.0163  | DERL2,HERPUD1,HYOU1,PPP1R15B,SYVN1                                                                                                                                                                                                                                                                                                                                                                                                                                                                                                                                                                                                                                                                                                                                                                                                                                                                                                                                                                                                                                                                                                                                                                                                                                                                                                                                                    |
| 2 | idiolike receptor signaling pathway                                                                 | 9   | 0.0168  | CD36,DUSP6,HSP90B1,IRAK2,NFKBIA,PEL1,PKC3AP1,TANK,TLR1                                                                                                                                                                                                                                                                                                                                                                                                                                                                                                                                                                                                                                                                                                                                                                                                                                                                                                                                                                                                                                                                                                                                                                                                                                                                                                                                |
| 4 | carbohydrate metabolic process                                                                      | 26  | 0.0171  | ALDH4E1,AMY2B,ATF3,ATF4,B3GNT5,CALR,CHST2,EXT1,FAH,P5, GQLC,GFPT1,GMPPE,GOT1,MLEC,OSTC,PC,PGM3,PPP1CB,RPN1,SEC24D,SEC31A,SLC3A2,STREGALNAQC,SYVN1,UAP1,UGDH                                                                                                                                                                                                                                                                                                                                                                                                                                                                                                                                                                                                                                                                                                                                                                                                                                                                                                                                                                                                                                                                                                                                                                                                                           |
| 3 | apoptotic process                                                                                   | 32  | 0.0171  | AFOX15B,APP,ATF4,BCL2A1,BEEX2,C10,CD38,CTNNB1,DDIT3,DDI1,DNAJC10,DYRK2,GQLC,HERPUD1,HMG81,HTRA2,KLF4,LUG4,MSH2,NFKBIA,PIW2,PPP2C8,PSM06,ROCK1,RTKN,SELK,SEMA3A,TNFRSF9,TNFSF10,TRAF1,TRIB3,ZC3H12A                                                                                                                                                                                                                                                                                                                                                                                                                                                                                                                                                                                                                                                                                                                                                                                                                                                                                                                                                                                                                                                                                                                                                                                    |
| 1 | protein transport                                                                                   | 35  | 0.0171  | ATP1B1,CALR,CD36,DERL2,EIF2AK3,GABARAPL2,HERPUD1,HSP90B1,KIAA1033,LIN7C,NFKBIA,NIP1,LOC4,PDIA4,PNP,RNF198,RPLP1,RPNI,RTTP4,SAR1A,SEC11C,SEC24D,SEC31A,SEL,IL,SELT,SIL1,SPCS2,SFPCS3,SYVN1,TCPI1,TMED7,TOB1,TRAM2,UFD1L,VPS28A,WFS1                                                                                                                                                                                                                                                                                                                                                                                                                                                                                                                                                                                                                                                                                                                                                                                                                                                                                                                                                                                                                                                                                                                                                    |
| 2 | B cell activation involved in immune response                                                       | 5   | 0.0179  | ADA,BATF,GPR183,LUG4,MSH2                                                                                                                                                                                                                                                                                                                                                                                                                                                                                                                                                                                                                                                                                                                                                                                                                                                                                                                                                                                                                                                                                                                                                                                                                                                                                                                                                             |
| 2 | response to molecule of bacterial origin                                                            | 14  | 0.0187  | ACFS,ANKRD1,CD36,CTR9,CYP27B1,IRAK2,NFKBIA,PDE4B,PEL1,PTGES,SERPINE1,TLR1,TRIB1,ZC3H12A                                                                                                                                                                                                                                                                                                                                                                                                                                                                                                                                                                                                                                                                                                                                                                                                                                                                                                                                                                                                                                                                                                                                                                                                                                                                                               |
| 4 | organic acid transmembrane transport                                                                | 9   | 0.0187  | CD36,CTNS,SLC14A,SLC14A5,SLC22A16,SLC28A6,SLC3A2,SLC37A1,SLC7A5                                                                                                                                                                                                                                                                                                                                                                                                                                                                                                                                                                                                                                                                                                                                                                                                                                                                                                                                                                                                                                                                                                                                                                                                                                                                                                                       |
| 1 | positive regulation of protein metabolic process                                                    | 38  | 0.0192  | ALK,KANG,APP,ATXN3,CTQTN1,C,DD276,CD36,CTNNB1,CTR9,EBI3,EIF2AK3,FAM129A,FRP1,GQLC,GDF15,GPR183,HERPUD1,HMG81,HSPA6,HSPH1,HTRA2,IER3,IRAK2,KLF4,MNP17L2,NFKBIA,PEL1,PSM08,RAP1B,SUMO1,TLR1,TNFSF10,TOFOR5,TRIB1,TRIB3,TRIM5,WFS1,ZFAND2A                                                                                                                                                                                                                                                                                                                                                                                                                                                                                                                                                                                                                                                                                                                                                                                                                                                                                                                                                                                                                                                                                                                                               |
| 4 | regulation of cellular catabolic process                                                            | 24  | 0.0201  | ATP1B1,ATXN3,CISD2,DDI14,GABARAPL2,GQLC,HERPUD1,HTRA2,IER3,LARP1B,PIW2,PSM06,SLC17A9,SLC14A,SUMO1,TAJ9,TMEM39A,TOB1,TRIB1,TRIB3,UBXN1,USP18,ZC3H12A,ZFAND2A                                                                                                                                                                                                                                                                                                                                                                                                                                                                                                                                                                                                                                                                                                                                                                                                                                                                                                                                                                                                                                                                                                                                                                                                                           |
| 1 | endoplasmic reticulum calcium ion homeostasis                                                       | 4   | 0.0223  | APP,ATP2A2,HERPUD1,WFS1                                                                                                                                                                                                                                                                                                                                                                                                                                                                                                                                                                                                                                                                                                                                                                                                                                                                                                                                                                                                                                                                                                                                                                                                                                                                                                                                                               |
| 4 | biological process                                                                                  | 207 | 0.023   | ACN9,ADP1,AGPAT9,ALDH1L2,ALK,AMY2B,ANG,ANKRD1,ANP32A,ARRHGFE10L,ASNA1,ATF4,ATF7IP2,ATL1,ATP1B1,ATP2A2,BANP,BCAS2,BCL2A1,BEEX2,BORA,C12orf65,CABLE32,CA LR,CARS,CAST,CCDC288,CCL23,CCL4L2,CD168,CD169,CD36,CDCA2,EP3,CHST2,CLIC2,COMMDD,CREL1,CTNNB1,CYB561,CYP27B1,CYP9A1A,DDIT3,DDX17,DHS11,DNAAF1,DNAJB9,DYD,DTX3L,DYRK2,EEF1B2,EEP1,EIF2AK3,ENTPD7,EVH1,EXT1,FAM129A,FANCE,FGFBP3,FICD,FKBP14,FKBP2,FKBP5,FNDC3A,FRP1,FR3,IZO2,GABARAPL2,GAD,DK3G1P1,GFP11,GMPPE,GNB4,GNL3,GPR132,GPR183,GPT2,HABP4,HCOS,HIAT1,HMG81,HSP90B1,HSPA6,HSPH1,DI2,IRAK2,ISOC2,KOTD15,KIAA1033,KIAA1279,KLF4,LARP1B,LAR P4,LUG4,LMNA1,LIN7C,LMPB3,LV75,LV9,LVPLA1,MANF,MATK,MBNL2,MEI1,MERTK,MLNRL,MSFSD2A,MIS22,MLEC,MPLKIP,MVF17L2,MSH2,MTI1H,MTM,MTTR1,MTHE,D2,NABP2,NDUFA5,NFKBIA,NFXL1,NIP1,LOC4,OSTC,PC,PDE4B,PDIA4,PDIA5,PDIA6,PIW2,PIGA,PNP,PPG,PPL1,1,PPP1CB,PPP4B,PSAT1,PSM06,PSYPI2,PTMA,ROCK1,ROG52,RNASE4,RNF198,ROCK1,RPPI1,RTKN,RTTP4,SAR1A,SDF2L1,SEC31A,SELK,SEMA3A,SERPINE1,SIL1,SLA,SLC10A7,SLC17A9,SLC17A9,SLC17A9,SLC17A9,SLC22A16,SLC28A6,SLC35B1,SLC39A14,SLC3A2,SLC37A1,SLC7A5,SLEFN1,SPH40,SRSF11,SRSF3,STREGALNAQC,SUMO1,SYVN1,TAJ9,TAJ9,TCPI1,TOBP2,TOFOR5,TRIM5,TNFSF10,TNFSF10,TNFSF10,TNFSF10,TNFSF10,TNFSF10,TNFSF10,TNFSF10,TRAM2,TRIB1,TRIB3,TRIM5,TSN,UAP1,UBA5,UBE2T,UBXN1,UFD1L,UGDH,UPB1,UOCOR1,USP18,VPS28A,V5X2,VWF,WFS1,WIP1,WIPAP,ZC3H12A,ZFAND2A,ZNF395,ZNF788 |
| 4 | cell activation                                                                                     | 22  | 0.0241  | APP,BATF,CAST,CD276,CD36,CTNNB1,EBI3,GPR183,HABP4,HMG81,HSPA6,DI2,LUG4,MERTK,MSH2,MTI1,G,RAAP1B,SERPINE1,SLAMF1,TLR1,TNFRSF4,WVF                                                                                                                                                                                                                                                                                                                                                                                                                                                                                                                                                                                                                                                                                                                                                                                                                                                                                                                                                                                                                                                                                                                                                                                                                                                      |
| 4 | establishment of protein localization                                                               | 36  | 0.0246  | ASNA1,ATP1B1,CALR,CD36,DERL2,EIF2AK3,GABARAPL2,HERPUD1,HSP90B1,KIAA1033,LIN7C,NFKBIA,NIP1,LOC4,PDIA4,PNP,RNF198,RPLP1,RPNI,RTTP4,SAR1A,SEC11C,SEC24D,SEC31A,SEL,IL,SELT,SIL1,SPCS2,SFPCS3,SYVN1,TCPI1,TMED7,TOB1,TRAM2,UFD1L,VPS28A,WFS1                                                                                                                                                                                                                                                                                                                                                                                                                                                                                                                                                                                                                                                                                                                                                                                                                                                                                                                                                                                                                                                                                                                                              |
| 1 | regulation of proteasomal protein catabolic process                                                 | 12  | 0.0246  | ATXN3,GABARAPL2,GQLC,HERPUD1,PSM06,SUMO1,TAJ9,TRIB1,TRIB3,UBXN1,USP18,ZFAND2A                                                                                                                                                                                                                                                                                                                                                                                                                                                                                                                                                                                                                                                                                                                                                                                                                                                                                                                                                                                                                                                                                                                                                                                                                                                                                                         |
| 2 | immune response                                                                                     | 36  | 0.0248  | ADA,APP,BATF,CAPZ1,CCL23,CCL4L2,CD164,CD276,CD36,CTNNB1,CYP27B1,DUSP6,EBI3,GPR183,HMG81,IRAK2,LUG4,LV75,MATK,MSH2,NFKBIA,PEL1,PNP,PRKCGH,PSM06,RNF198,SLC28A6,SUMO1,TANK,TLR1,TNFSF4,TNFSF10,TRIB3,TRIM5,USP18                                                                                                                                                                                                                                                                                                                                                                                                                                                                                                                                                                                                                                                                                                                                                                                                                                                                                                                                                                                                                                                                                                                                                                        |

|   |                                                                                                         |     |        |                                                                                                                                                                                                                                                                                                                                                                                                                                                                                                                                                                                                                                                                                                                                                                                                                  |
|---|---------------------------------------------------------------------------------------------------------|-----|--------|------------------------------------------------------------------------------------------------------------------------------------------------------------------------------------------------------------------------------------------------------------------------------------------------------------------------------------------------------------------------------------------------------------------------------------------------------------------------------------------------------------------------------------------------------------------------------------------------------------------------------------------------------------------------------------------------------------------------------------------------------------------------------------------------------------------|
| 4 | regulation of catabolic process                                                                         | 26  | 0.0248 | ATP1B1,ATXN3,BANP,CISD2,DDIT4,DERL2,GABARAPL2,GQLC,HERPUD1,HTRA2,IER3,LARP1B,PIW2,PSMOC6,SLC17A4,SUMO1,TAE9,TM6M9A,TOB1,TRIB1,TRIB3,UBXN1,USP18,ZC3H12A,ZFAND2A                                                                                                                                                                                                                                                                                                                                                                                                                                                                                                                                                                                                                                                  |
| 4 | macromolecule metabolic process                                                                         | 133 | 0.0248 | ALG13,ALK,ANG,ANKRD1,ANP32A,APP,ASNA1,ASNS,ATF3,ATF7IP2,ATMIN,B3GNT5,BANP,BCAS2,C12orf65,C1D,CALR,CARS,CHST2,COMMDB,CTNNB1,CTR9,DDIT3,DDIT4,DDX17,DERL2,DNAJA4,DNAJB5,DNAJB9,DNAJC10,DTXL,DDUSP6,DYRK2,EEF1B2,EERP1,EXT1,FANCE,FICD,FKBP11,FKBP14,FKBP2,FKBP4,FKBP5,G3BP1,GADD45GIP1,GFP1T,GMPFB,HABP4,HMG81,HRSF12,HSP90B1,HSPA5,HSPH1,HTRA2,HYOU1,IDD,IRAK2,KLF4,KPM2,LANC4,LMQ4,MATIK1,MENL2,MERTK,MLE,C,MSH2,MTM4,NABP2,NFXL1,NPLOC4,OSTC,PDIA4,PDIA5,PDIA6,PELI1,PFND2,PGM3,PIGA,PIW2,PP1C,PPP1B,PPP4B,PSMOC6,PTM,RAO9A,RNA52A,RNF199,ROCK1,RP1,RPN1,SDF2L1,SEC24D,SEC31A,SEL1L,SELT,SERPINE1,SERTAD3,SIL1,SPOCD1,SRSF11,SRSF3,STGALNA4C4,SUMO1,SVVN1,TAJ9,TARS,TOPI1,TPD2,TNFSF10,TOPORS,TRAM2,TRIB1,TRIB3,TRIM5,V5X2,WFS1,ZNF395,ZNF789,ZUBXN1,UFD1L,UGDH,USP18,V5X2,WVF1,WPI1,WTPA,ZC3H12A,ZNF395,ZNF789 |
| 3 | negative regulation of neuron death                                                                     | 10  | 0.0248 | AARS,ATF4,CTNNB1,GGLC,HTRA2,HYOU1,ILG4,MSH2,ROCK1,WFS1                                                                                                                                                                                                                                                                                                                                                                                                                                                                                                                                                                                                                                                                                                                                                           |
| 4 | single-organism biosynthetic process                                                                    | 36  | 0.0254 | ABAT,ADP1,AGPAT9,ALOX15B,ANG,ASNS,ATF3,ATF4,B3GNT5,CHST2,CTNS,CYP27B1,CYP51A1,DPVD,ELOVL6,EXT1,FABP5,GADD45GIP1,GGLC,GFP1T,GMPFB,GF2T,MTM,MTM R4,NPLOC4,PC,PGM3,PIGA,PMP,PSA1,PTGES,TRAM2,UAP1,UFD1L,UGDH,UPEB1                                                                                                                                                                                                                                                                                                                                                                                                                                                                                                                                                                                                  |
| 1 | post-translational protein modification                                                                 | 15  | 0.0256 | ALG13,B3GNT5,CALR,GFP1T,GMPFB,MLEC,PGM3,PIGA,PRKCSH,RPN1,SEC24D,SEC31A,STGALNA4C4,SUMO1,UAP1                                                                                                                                                                                                                                                                                                                                                                                                                                                                                                                                                                                                                                                                                                                     |
| 4 | signal peptide processing                                                                               | 3   | 0.0263 | SEC11C,SFCS2,SFCS3                                                                                                                                                                                                                                                                                                                                                                                                                                                                                                                                                                                                                                                                                                                                                                                               |
| 1 | protein catabolic process                                                                               | 20  | 0.0281 | ATXN3,DDIT3,DERL2,DNAJB9,DNAJC10,HSP90B1,HSPA5,HTRA2,LYPLA1,NPLOC4,PPP2C8,PSMOC6,SDF2L1,SEL1L,SVVN1,TOPORS,UBXN1,UFD1L,USP18,WFS1                                                                                                                                                                                                                                                                                                                                                                                                                                                                                                                                                                                                                                                                                |
| 1 | glycosylation                                                                                           | 14  | 0.0281 | B3GNT5,CALR,EXT1,GFP1T,GMPFB,MLEC,OSTC,PGM3,RPN1,SEC24D,SEC31A,STGALNA4C4,SVVN1,UAP1                                                                                                                                                                                                                                                                                                                                                                                                                                                                                                                                                                                                                                                                                                                             |
| 1 | regulation of protein metabolic process                                                                 | 56  | 0.0285 | AARS,ALK,ANG,ATF3,ATXN3,BANP,CTNIN1,CTR9,DDIT4,DERL2,DNAJC10,DUSP6,EBI3,EIF2AK3,FAM129A,FRP1,GABARAPL2,GQLC,GDF15,GPR183,HMG81,HSP90B1,HSPA5,HSPH1,HTRA2,IER3,IRAK2,KLF4,MAPV17L2,NFKBIA,PELI1,PPP1CB,PPP1R15B,PSMOC6,RAP1B,RS2,SELT,SERPINE1,SPOOD1,SUMO1,TAJ9,TLR1,TNFSF10,TOB1,TOPORS,TRIB1,TRIB3,TRIM5,UBXN1,USP18,WFS1,ZFAND2A                                                                                                                                                                                                                                                                                                                                                                                                                                                                              |
| 4 | cellular response to DNA damage stimulus                                                                | 23  | 0.0289 | ATMIN,ATXN3,BATF,BCL2A1,DDIT3,DDIT4,DTX3L,DYRK2,EERP1,FANCE,HMG81,HTRA2,IER3,ILG4,MSH2,NPLOC4,PSMOC6,RAD9A,SUMO1,TAJ9,TPP2,UBE2T,UFD1L                                                                                                                                                                                                                                                                                                                                                                                                                                                                                                                                                                                                                                                                           |
| 4 | gamma-aminobutyric acid catabolic process                                                               | 2   | 0.0289 | ABAT,ALDH5A1                                                                                                                                                                                                                                                                                                                                                                                                                                                                                                                                                                                                                                                                                                                                                                                                     |
| 4 | beta-alanine biosynthetic process                                                                       | 2   | 0.0289 | DPVD,UPEB1                                                                                                                                                                                                                                                                                                                                                                                                                                                                                                                                                                                                                                                                                                                                                                                                       |
| 2 | positive regulation of B cell proliferation                                                             | 5   | 0.0289 | ADA,CD38,GPR183,PELI1,TNFRSF4                                                                                                                                                                                                                                                                                                                                                                                                                                                                                                                                                                                                                                                                                                                                                                                    |
| 2 | positive regulation of lymphocyte proliferation                                                         | 8   | 0.0289 | ADA,CD276,CD38,EBI3,GPR183,PELI1,PMP,TNFRSF4                                                                                                                                                                                                                                                                                                                                                                                                                                                                                                                                                                                                                                                                                                                                                                     |
| 4 | regulation of transcription from RNA polymerase II promoter in response to arsenic-containing substance | 2   | 0.0289 | ATF3,ATF4                                                                                                                                                                                                                                                                                                                                                                                                                                                                                                                                                                                                                                                                                                                                                                                                        |
| 2 | cellular response to molecule of bacterial origin                                                       | 9   | 0.0289 | ANKRD1,CD36,CTR9,IRAK2,NFKBIA,PDE4B,SERPINE1,TLR1,ZC3H12A                                                                                                                                                                                                                                                                                                                                                                                                                                                                                                                                                                                                                                                                                                                                                        |
| 1 | regulation of ATF6-mediated unfolded protein response                                                   | 2   | 0.0289 | HSPA5,WFS1                                                                                                                                                                                                                                                                                                                                                                                                                                                                                                                                                                                                                                                                                                                                                                                                       |
| 2 | immune system process                                                                                   | 48  | 0.0292 | APP,ATP1B1,BATF,CALR,CARZ1,CC123,CC142,CD164,CD276,CD38,CYP27B1,DDIT4,DUSP6,GPR183,HMG81,HSP90B1,IDD,IRAK2,KLF4,ILG4,LY75,MAPT,MSH2,MTM,PGM3,PIK3AP1,PMP,PRKCSH,PSMOC6,RNF199,ROCK1,SEC24D,SEC31A,SLAMF1,SLC26A6,SLC3A2,SLC7A5,SLFN11,SUMO1,TAK1,TM6M91,TNFRSF4,TNFSF10,TRIB3,TRIM5,USP18                                                                                                                                                                                                                                                                                                                                                                                                                                                                                                                        |
| 4 | single-organism catabolic process                                                                       | 27  | 0.0292 | ABAT,ALDH1L2,ALDH5A1,CISD2,CYP27B1,DERL2,DNAJB9,DNAJC10,DPVD,FABP5,GABARAPL2,GFP1T,HERPUD1,HSP90B1,HSPA5,NPLOC4,PDE4B,PMP,PPP10B,PSMOC6,SDF2L1,SEL1L,SVVN1,UFD1L,UPEB1,WPI1                                                                                                                                                                                                                                                                                                                                                                                                                                                                                                                                                                                                                                      |
| 4 | small molecule biosynthetic process                                                                     | 16  | 0.0295 | ABAT,ADP1,ALOX15B,ASNS,CYP27B1,CYP51A1,DPVD,ELOVL6,FABP5,GF2T,MTM,FDZ,PMP,PSA1,PTGES,UGDH,UPEB1                                                                                                                                                                                                                                                                                                                                                                                                                                                                                                                                                                                                                                                                                                                  |
| 1 | negative regulation of protein metabolic process                                                        | 30  | 0.0295 | ANG,APP,ATF3,BANP,CALR,CD276,CTNNB1,DDIT4,DERL2,DNAJC10,DUSP6,EIF2AK3,FAM129A,GABARAPL2,GQLC,HERPUD1,HRSF12,HSPH1,KLF4,PPP1R15B,PSMOC6,RS2,SERPINE1,SPOCD1,TAJ9,TNFSF10,TOB1,TRIB1,TRIB3,UBXN1                                                                                                                                                                                                                                                                                                                                                                                                                                                                                                                                                                                                                   |
| 4 | anion transmembrane transport                                                                           | 13  | 0.0302 | ASNA1,CD236,CLIC2,CTNS,GABRE,SLOC1A4,SLOC1A5,SLOC22A16,SLC26A6,SLC35B1,SLC3A2,SLC7A1,SLC7A5                                                                                                                                                                                                                                                                                                                                                                                                                                                                                                                                                                                                                                                                                                                      |
| 3 | negative regulation of apoptotic signaling pathway                                                      | 11  | 0.0304 | BCL2L1,CTNNB1,GQLC,HERPUD1,HSPH1,HTRA2,IER3,SERPINE1,SVVN1,TAJ9,WFS1                                                                                                                                                                                                                                                                                                                                                                                                                                                                                                                                                                                                                                                                                                                                             |
| 2 | response to lipopolysaccharide                                                                          | 13  | 0.0315 | ACPS,ANKRD1,CD36,CTR9,CYP27B1,IRAK2,NFKBIA,PDE4B,PELI1,PTGES,SERPINE1,TRIB1,ZC3H12A                                                                                                                                                                                                                                                                                                                                                                                                                                                                                                                                                                                                                                                                                                                              |
| 3 | regulation of neuron death                                                                              | 12  | 0.0315 | AARS,ATF4,CTNNB1,DDIT3,DDIT4,GQLC,HTRA2,HYOU1,ILG4,MSH2,ROCK1,WFS1                                                                                                                                                                                                                                                                                                                                                                                                                                                                                                                                                                                                                                                                                                                                               |
| 4 | single-organism intracellular transport                                                                 | 32  | 0.0315 | APP,ATP1B1,ATP2A2,CALR,DDIT3,DERL2,GABARAPL2,HERPUD1,HSP90B1,KIAA1033,KIAA11279,KPNA2,NFKBIA,NPLOC4,RP1P1,RPN1,RTD4,SEC11C,SEC24D,SEC31A,SEL1L,SPC32,SPCS3,SRSF11,SRSF3,SVVN1,TOB1,UFD1L,VP526A,WFS1,WPI1,XCR1                                                                                                                                                                                                                                                                                                                                                                                                                                                                                                                                                                                                   |
| 1 | protein maturation by protein folding                                                                   | 3   | 0.032  | CALR,EROT1B,WFS1                                                                                                                                                                                                                                                                                                                                                                                                                                                                                                                                                                                                                                                                                                                                                                                                 |
| 3 | negative regulation of apoptotic process                                                                | 26  | 0.032  | AARS,ADA,ASNS,BCL2A1,CAST,CD38,CTNNB1,EIF2AK3,HSP90B1,HSPA5,HSPH1,HTRA2,KLF4,ILG4,MSH2,NFKBIA,PIW2,PSMOC6,ROCK1,SERPINE1,SVVN1,TAJ9,TNFSF10,TOPORS,WFS1                                                                                                                                                                                                                                                                                                                                                                                                                                                                                                                                                                                                                                                          |
| 1 | glycoprotein biosynthetic process                                                                       | 15  | 0.0333 | ALG13,B3GNT5,CALR,EXT1,GFP1T,GMPFB,MLEC,OSTC,PGM3,RPN1,SEC24D,SEC31A,STGALNA4C4,SVVN1,UAP1                                                                                                                                                                                                                                                                                                                                                                                                                                                                                                                                                                                                                                                                                                                       |
| 1 | regulation of proteasomal ubiquitin-dependent protein catabolic process                                 | 9   | 0.0333 | ATXN3,GQLC,HERPUD1,SUMO1,TAJ9,TRIB1,TRIB3,UBXN1,ZFAND2A                                                                                                                                                                                                                                                                                                                                                                                                                                                                                                                                                                                                                                                                                                                                                          |
| 4 | positive regulation of macromolecule metabolic process                                                  | 59  | 0.0351 | ALK,ANG,ANKRD1,APP,ATF3,ATMIN,ATXN3,BANP,BATF,CALR,COG61,CD276,CD36,CD38,CTNNB1,CTR9,DDIT3,DDX17,DYRK2,EBI3,FAM129A,FRP1,FZD2,GQLC,GDF15,GNL3,GPR183,HERPUD1,HMG81,HSPH1,HTRA2,IDD,IER3,IRAK2,KLF4,LARP1B,MAP,MEK21,MAPV17L2,NFKBIA,PELI1,PIW2,PSMOC6,RAP1B,SERPINE1,SERTAD3,SUMO1,TAJ9,TLR1,TNFSF10,TOPORS,TRAF1,TRIB1,TRIB3,TRIM5,V5X2,WFS1,ZC3H12A,ZFAND2A                                                                                                                                                                                                                                                                                                                                                                                                                                                    |
| 4 | positive regulation of cellular metabolic process                                                       | 62  | 0.0357 | ALK,ANG,ANKRD1,APP,ATF3,ATMIN,ATP1B1,ATXN3,BANP,BATF,COTN1F,CALR,COG61,CD276,CD36,CD38,CTNNB1,CTR9,DDIT3,DDX17,DYRK2,EBI3,FAM129A,FRP1,FZD2,GQLC,GDF15,GNL3,GPR183,HERPUD1,HMG81,HSPH1,HTRA2,IDD,IER3,IRAK2,KLF4,LARP1B,MAP,MEK21,MAPV17L2,NFKBIA,PELI1,PIW2,PSMOC6,RAP1B,SERPINE1,SERTAD3,SLC14A4,SUMO1,TAJ9,TLR1,TM6M9A,TNFSF10,TOB1,TOPORS,TRAF1,TRIB1,TRIB3,TRIM5,V5X2,ZC3H12A,ZFAND2A                                                                                                                                                                                                                                                                                                                                                                                                                       |
| 4 | positive regulation of metabolic process                                                                | 73  | 0.0364 | ALK,ANG,ANKRD1,APP,ARHGEP10L,ATF3,ATMIN,ATP1B1,ATXN3,BANP,BATF,CALR,COG61,CD276,CD36,CD38,CDG4E29,CTNNB1,CTR9,CYP27B1,DDIT3,DDX17,DNAJC10,DYRK2,EBI3,EVL,FAM129A,FRP1,FZD2,GABARAPL2,GQLC,GDF15,GNL3,GPR183,HERPUD1,HMG81,HSPH1,HTRA2,IDD,IER3,IRAK2,KLF4,LARP1B,MAP,MEK21,MAPV17L2,MSH2,NFKBIA,PELI1,PIGA,PIW2,PSMOC6,RAP1B,ROCK1,RS2,SERPINE1,SERTAD3,SLC14A4,SUMO1,TAJ9,TLR1,TM6M9A,TNFSF10,TOB1,TOPORS,TRAF1,TRIB1,TRIB3,TRIM5,V5X2,WFS1,ZC3H12A,ZFAND2A                                                                                                                                                                                                                                                                                                                                                     |



|   |                                                                           |     |        |                                                                                                                                                                                                                                                                                                                                                                                                                                                                                                                                                                                                                                                                                                                                                                                                                                                                                                                                    |
|---|---------------------------------------------------------------------------|-----|--------|------------------------------------------------------------------------------------------------------------------------------------------------------------------------------------------------------------------------------------------------------------------------------------------------------------------------------------------------------------------------------------------------------------------------------------------------------------------------------------------------------------------------------------------------------------------------------------------------------------------------------------------------------------------------------------------------------------------------------------------------------------------------------------------------------------------------------------------------------------------------------------------------------------------------------------|
| 4 | protein localization                                                      | 42  | 0.0384 | ASNA1,ATP1B1,BANP,CALR,CD36,CTNNB1,DERL2,EIF2AK3,FKBP4,GABARAPL2,HERPUD1,HSP90B1,HSPA5,KIAA1033,LIN7C,NFKBIA,NPL0C4,PDIA4,PNP,PNF19B,RP1,RPN1,RTT4,SAR1A,SEC11C,SEC24D,SEC31A,SELT,IL,SELT,SIL1,SPCS2,SPCS3,SYVN1,TCOP1,TIME07,TOB1,TOPOORS,TRAM2,UFD1L,VPS28A,WFS1,WIP1                                                                                                                                                                                                                                                                                                                                                                                                                                                                                                                                                                                                                                                           |
| 3 | negative regulation of cell death                                         | 27  | 0.0389 | AARS,ADA,ASNS,ATF4,BCL2L1,CAST,CD38,CTNNB1,EIF2AK3,HSP90B1,HSPA5,HSPH1,HTRA2,KL,F4,LI,G4,MERTK,MSH2,NFKBIA,PNM2,PSMCG,ROCK1,SERPINE1,SYVN1,TA,F9,TNFSF10,TOPOORS,WFS1                                                                                                                                                                                                                                                                                                                                                                                                                                                                                                                                                                                                                                                                                                                                                              |
| 4 | primary metabolic process                                                 | 148 | 0.0405 | ADI1,AGPAT9,ALDH1L2,ALX,AMV,2B,ANG,ANKRD1,ANP32A,ASNA1,ASNS,ATF7IP2,ATMIN,B3GN15,BANP,BCAS2,C12orf65,C1D,CALR,CARS,CD36,CHST2,COMMD8,CTNNB1,CTNS,CTR9,CYP27B1,CYP51A1,DDIT3,DDIT4,DDX17,DERL2,DNAJA4,DNAJB5,DNAJB9,DNAJC10,DPVD,DTX3L,DUSP6,DYRK2,EEF1B2,EEPD1,ELOVL6,EXT1,FANCE,FICD,FKBP11,FKBP14,FKBP2,FKBP4,FKBP5,G3BP1,GADD45G,IP1,GFP11,GMPFB,GP12,HABP4,HMG81,HRS,SP12,HSP90B1,HSPA5,HSPH1,HYOU1,HD,IRAK2,KL,F4,KPNA2,LIG4,LMO4,LYPLA1,MATK,MBNL2,ME,RTK,MLEC,MSH2,MTMR4,NABP2,NDUFAG5,NFKL1,NPL0C4,OSTC,PC,PDE4B,PDIA4,PDIA5,PDIA6,PEL1,PFON2,PGM3,PIGA,PNM2,PNP,PP9G,PLL1,PPP1CB,PRPF4B,PSAT1,PSMCG,PTGES,PTMA,RAD9A,RNASE4,RNF19B,ROCK1,RP1,RPN1,SDFZL1,SEC24D,SEC31A,SELT,SERPINE1,SERTAD3,SIL1,SLC3A2,SLC7A5,SPOCD1,SRSF11,SRSF3,STB6GALNA,C4,SUMO1,SYVN1,TA,F9,TARS,TCOP1,TDP2,TNFSF10,TOPOORS,TRIB1,TRIM5,TSN,TUBA3D,TUBB3,UAP1,UBA5,UBE2T,UBXN1,UFD1L,UGDH,UPB1,USP18,V5X2,WVF,WFS1,WIP1,WTPA,Z,CH12A,ZNF395,ZNF768 |
| 3 | regulation of intrinsic apoptotic signaling pathway                       | 9   | 0.0405 | BCL2L1,DDIT3,HERPUD1,HSPH1,HTRA2,RAD9A,SYVN1,TA,F9,WFS1                                                                                                                                                                                                                                                                                                                                                                                                                                                                                                                                                                                                                                                                                                                                                                                                                                                                            |
| 4 | regulation of sequence-specific DNA binding transcription factor activity | 15  | 0.0409 | ALK,DDIT3,FZD2,IRAK2,KL,F4,NFKBIA,PEL1,SUMO1,TNFRSF4,TRAF1,TRIB1,TRIM5,WFS1,ZC3H12A                                                                                                                                                                                                                                                                                                                                                                                                                                                                                                                                                                                                                                                                                                                                                                                                                                                |
| 1 | intracellular protein transport                                           | 23  | 0.0485 | ATP1B1,CALR,DERL2,HERPUD1,HSP90B1,KPNA2,NFKBIA,NPL0C4,RP1,RPN1,RTA4,SAR1A,SEC11C,SEC24D,SELT,SIL1,SPCS2,SPCS3,SYVN1,TOB1,UFD1L,VPS28A,WFS1                                                                                                                                                                                                                                                                                                                                                                                                                                                                                                                                                                                                                                                                                                                                                                                         |
| 4 | cell communication                                                        | 97  | 0.0486 | AARS,ABAT,ALDH9A1,ALK,ANG,ANP32A,APP,ASNA1,ASNS,ATP1B1,ATP2A2,ATXN3,BATF,BCL2L1,CALR,CCL23,CD164,CD36,CD38,DDC4,ZEP3,GSD2,CLC2,CTNNB1,CTR9,DDIT4,DE,R2,DNAJB11,DNAJB9,DNAJC10,DUSP6,DYRK2,EBI3,EVL,EXT1,FKBP14,FKBP4,FKBP5,FKBP11,FKBP13,G3BP1,GABARAPL2,GABRE,GDF15,GFP11,GNB4,GPR132,GPR183,HERPUD1,HSP90B1,HSPA5,HTRA2,HYOU1,IER3,IRAK2,KCNK6,KL,F4,KPNA2,LIN7C,MATK,MSH2,MTMR4,PDE4B,PDIA5,PDIA6,PIK3AP1,PPP1CB,PPP1R15B,PPP2C8B,PRKCSH,PSMCG,PTGES,ROCK1,RTKN,SEC31A,SELT,SELK,SELT,SEMA3A,SERPINE1,SLAMF1,SLC1A4,SLC2B6A,SRSF3,SUMO1,SYVN1,TDP2,TNFRSF4,TNFSF10,TOB1,TRAF1,TRIB1,TRIB3,TRIM5,USP18,WFS1,WIP1,XCR1                                                                                                                                                                                                                                                                                                            |
| 4 | carboxylic acid biosynthetic process                                      | 12  | 0.0486 | ABAT,ADI1,ALOX15B,ASNS,DPVD,ELOVL6,GPT2,MTHFD2,PSAT1,PTGES,UGDH,UPB1                                                                                                                                                                                                                                                                                                                                                                                                                                                                                                                                                                                                                                                                                                                                                                                                                                                               |
| 3 | negative regulation of intrinsic apoptotic signaling pathway              | 7   | 0.0486 | BCL2L1,HERPUD1,HSPH1,HTRA2,SYVN1,TA,F9,WFS1                                                                                                                                                                                                                                                                                                                                                                                                                                                                                                                                                                                                                                                                                                                                                                                                                                                                                        |
| 4 | regulation of localization                                                | 52  | 0.0489 | ABAT,ADA,ALOX15B,ANG,ANKRD1,ATF4,ATP1B1,ATP2A2,BORA,C10orf11,CALR,CDZ76,CD36,CD38,CLC2,CTNNB1,DDIT3,DERL2,DNAJF1,DYRK2,EIF2AK3,EVL,HMG81,HSPA5,HSPH1,HTRA2,IER3,KCNK6,KL,F4,LYPLA1,MERTK,NFKBIA,PDE4B,RAIP1B,ROCK1,SAR1A,SEC11C,SERPINE1,SLAMF1,SLC17A9,SLC26A6,SPCS2,SPCS3,SUMO1,TLR1,TNFRSF4,TNFRSF9,TRIB1,TRIB3,WFS1,XCR1,ZC3H12A                                                                                                                                                                                                                                                                                                                                                                                                                                                                                                                                                                                               |
| 4 | positive regulation of macromolecule biosynthetic process                 | 40  | 0.0494 | ALK,ANKRD1,APP,ATF3,ATMIN,BANP,BATF,CALR,CCPG1,CD276,CD38,CTNNB1,CTR9,DDIT3,DDX17,DYRK2,EBB,FAM129A,FZD2,GNL3,HMG81,HSPA5,HSPH1,HD,IRAK2,KL,F4,MAFM,ED21,MPV17L2,NFKBIA,PM2,PSMCG,SERPINE1,SERTAD3,TA,F9,TLR1,TOPOORS,TRAF1,TRIM5,V5X2                                                                                                                                                                                                                                                                                                                                                                                                                                                                                                                                                                                                                                                                                             |

Pathway association denoted by colour as follows: UPR only (Blue), Inflammation only (Green), Cell survival (Red), UPR and Inflammation (Purple), General cell process (Grey)
