# Supplementary material for: Pathogen‐induced inflammation is attenuated by the iminosugar MON‐DNJ via modulation of the unfolded protein response
Source: PubMed Central journal article supplement (PMC8517592; doi:10.1111/imm.13393), 2021-08-01
Supplement: IMM-164-587-s006.pdf [file IMM-164-587-s006.pdf]

Supplemental Table 6. Genes used to construct network in Figure 7c

| Gene Symbol    | Gene Name                                                                                     | UPR | Inflammation | Cell Fate |
|----------------|-----------------------------------------------------------------------------------------------|-----|--------------|-----------|
| ADA            | Adenosine deaminase                                                                           | Y   | Y            | Y         |
| ANKRD1         | Ankyrin repeat domain 1 (cardiac muscle)                                                      | Y   | Y            | Y         |
| APP            | Amyloid beta (A4) precursor protein                                                           | Y   | Y            | Y         |
| <b>BCL2A1</b>  | <b>BCL2-related protein A1</b>                                                                | Y   | N            | Y         |
| <b>C1D</b>     | <b>C1D nuclear receptor corepressor</b>                                                       | N   | N            | Y         |
| CALR           | Calreticulin                                                                                  | Y   | Y            | Y         |
| <b>CAPZA1</b>  | <b>Capping protein (actin filament) muscle Z-line, alpha 1</b>                                | Y   | Y            | N         |
| <b>CAST</b>    | <b>Calpastatin</b>                                                                            | N   | N            | Y         |
| <b>CD164</b>   | <b>CD164 molecule, sialomucin</b>                                                             | N   | Y            | N         |
| CD38           | CD38 molecule                                                                                 | Y   | Y            | Y         |
| <b>CTNNB1</b>  | <b>Catenin (cadherin-associated protein), beta 1, 88kDa</b>                                   | Y   | Y            | Y         |
| <b>CTR9</b>    | <b>Ctr9, Paf1/RNA polymerase II complex component, homolog (S. cerevisiae)</b>                | Y   | Y            | N         |
| DDIT4          | DNA-damage-inducible transcript 4                                                             | Y   | Y            | Y         |
| DUSP6          | Dual specificity phosphatase 6                                                                | Y   | Y            | Y         |
| <b>GCLC</b>    | <b>Glutamate-cysteine ligase, catalytic subunit</b>                                           | Y   | N            | Y         |
| <b>GPR183</b>  | <b>G protein-coupled receptor 183</b>                                                         | Y   | Y            | N         |
| <b>HMGB1</b>   | <b>High mobility group box 1</b>                                                              | Y   | Y            | Y         |
| HSP90B1        | Heat shock protein 90kDa beta (Grp94), member 1                                               | Y   | Y            | Y         |
| KLF4           | Kruppel-like factor 4 (gut)                                                                   | Y   | Y            | Y         |
| <b>LIG4</b>    | <b>Ligase IV, DNA, ATP-dependent</b>                                                          | Y   | Y            | Y         |
| <b>LY75</b>    | <b>Lymphocyte antigen 75</b>                                                                  | Y   | Y            | N         |
| MSH2           | mutS homolog 2, colon cancer, nonpolyposis type 1 (E. coli)                                   | Y   | Y            | Y         |
| NFKBIA         | Nuclear factor of kappa light polypeptide gene enhancer in B-cells inhibitor, alpha           | Y   | Y            | Y         |
| <b>PIK3AP1</b> | <b>Phosphoinositide-3-kinase adaptor protein 1</b>                                            | N   | Y            | N         |
| PIM2           | Pim-2 oncogene                                                                                | Y   | Y            | Y         |
| <b>PPP1CB</b>  | <b>Protein phosphatase 1, catalytic subunit, beta isozyme</b>                                 | Y   | N            | Y         |
| <b>PPP2CB</b>  | <b>Protein phosphatase 2, catalytic subunit, beta isozyme</b>                                 | Y   | N            | Y         |
| <b>PSMC6</b>   | <b>Proteasome (prosome, macropain) 26S subunit, ATPase, 6</b>                                 | Y   | Y            | Y         |
| <b>ROCK1</b>   | <b>Rho-associated, coiled-coil containing protein kinase 1</b>                                | Y   | Y            | Y         |
| SERPINE1       | Serpin peptidase inhibitor, clade E (nexin, plasminogen activator inhibitor type 1), member 1 | Y   | Y            | Y         |
| <b>SUMO1</b>   | <b>SMT3 suppressor of mif two 3 homolog 1 (S. cerevisiae)</b>                                 | Y   | Y            | Y         |
| <b>TAF9</b>    | <b>TAF9 RNA polymerase II, TATA box binding protein (TBP)-associated factor, 32kDa</b>        | Y   | N            | Y         |
| <b>TANK</b>    | <b>TRAF family member-associated NFKB activator</b>                                           | Y   | Y            | N         |
| <b>TLR1</b>    | <b>Toll-like receptor 1</b>                                                                   | Y   | Y            | N         |
| TNFRSF4        | Tumor necrosis factor receptor superfamily, member 4                                          | Y   | Y            | Y         |
| TNFSF10        | Tumor necrosis factor (ligand) superfamily, member 10                                         | Y   | Y            | Y         |
| <b>TOPORS</b>  | <b>Topoisomerase I binding, arginine/serine-rich, E3 ubiquitin protein ligase</b>             | Y   | N            | Y         |
| TRIB1          | Tribbles homolog 1 (Drosophila)                                                               | Y   | Y            | Y         |
| TRIB3          | Tribbles homolog 3 (Drosophila)                                                               | Y   | Y            | Y         |
| ZC3H12A        | Zinc finger CCCH-type containing 12A                                                          | Y   | Y            | Y         |

Bold text indicates transcriptional response pattern indicated by (\*) in Figure 3
