# Supplementary material for: Pathogen‐induced inflammation is attenuated by the iminosugar MON‐DNJ via modulation of the unfolded protein response
Source: PubMed Central journal article supplement (PMC8517592; doi:10.1111/imm.13393), 2021-08-01
Supplement: IMM-164-587-s007.pdf [file IMM-164-587-s007.pdf]

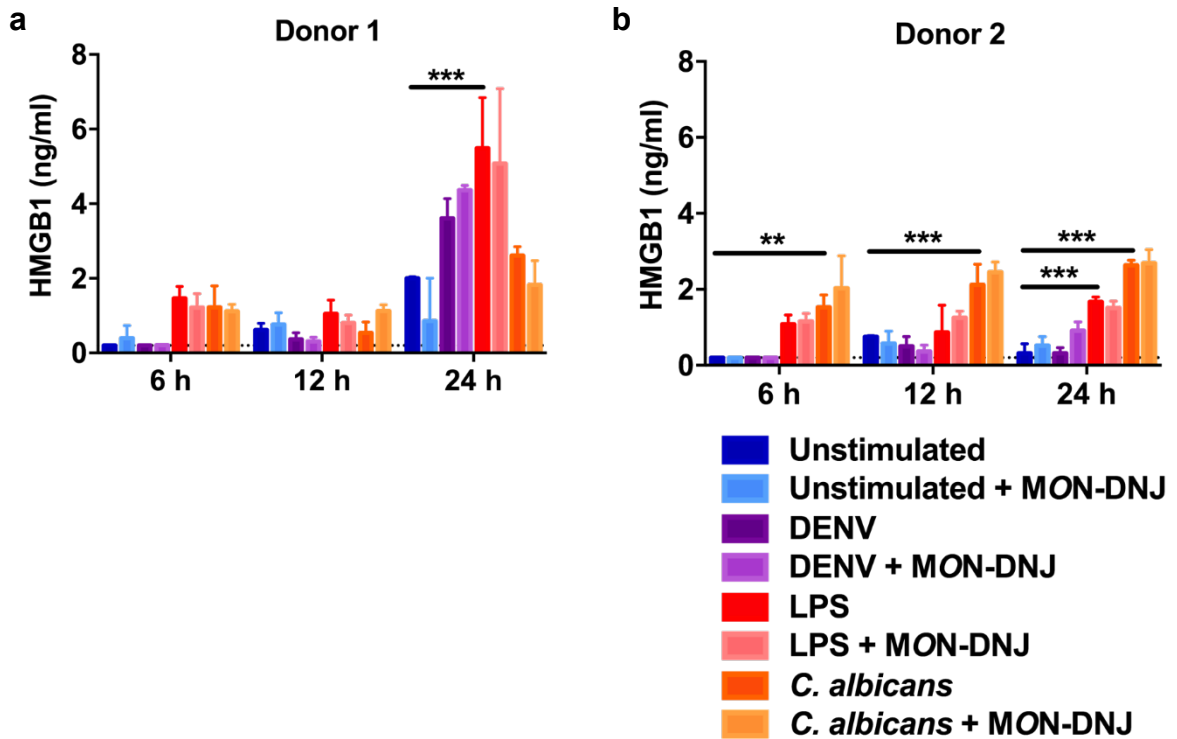

**Supplemental Figure S3** HMGB1 secretion is induced by LPS and heat-killed *C. albicans*, but MON-DNJ does not affect levels. Two donors (a, b) were treated as previously described with infectious stimuli +/- 25  $\mu$ M MON-DNJ for 6, 12, and 24 hour time points. Supernatants were collected for HMGB1 ELISA as described in the Methods. Each sample was assayed in technical triplicate ( $n=3$ ). Repeated Measures Two way ANOVA with Holm-Šídák correction for multiple comparisons was performed to identify statistically significant differences. All error bars represent standard deviation. \*  $p < 0.05$ , \*\*  $p < 0.01$ , \*\*\*  $p < 0.001$
