# Supplementary material for: Pathogen‐induced inflammation is attenuated by the iminosugar MON‐DNJ via modulation of the unfolded protein response
Source: PubMed Central journal article supplement (PMC8517592; doi:10.1111/imm.13393), 2021-08-01
Supplement: IMM-164-587-s009.pdf [file IMM-164-587-s009.pdf]

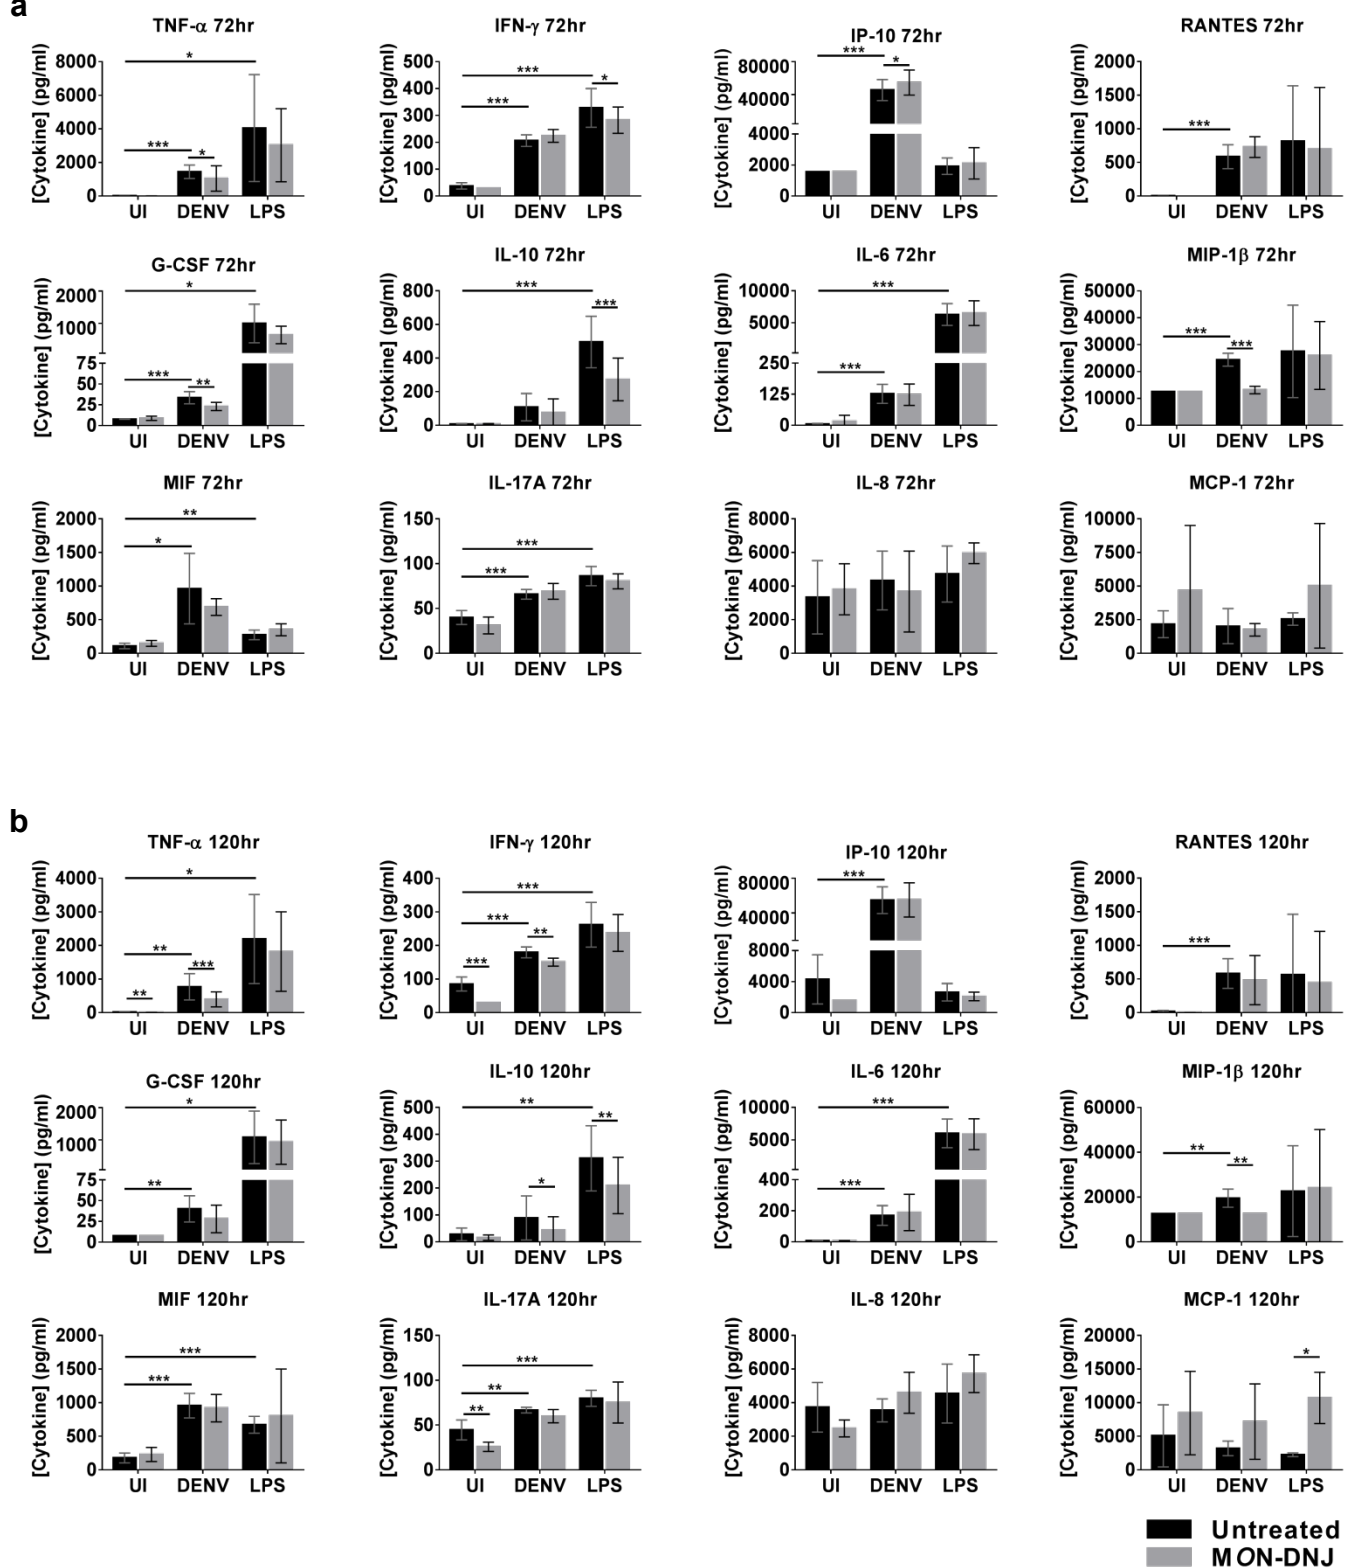

**Supplemental Figure S2** Sustained reduction of cytokine by MON-DNJ is target specific. Cytokines were assayed on a Luminex platform and analyzed for statistically significant differences as described for **Fig. 1** with collection at 72 hours (a) and 120 hours (b) p.i. for the same donors. Biological replicates ( $n=5$ ) were assayed in technical singlicate. Discontinuous axes are used where necessary as a consequence of  $> 10$  fold difference in level of cytokine induced by DENV and LPS. MON-DNJ (grey bars) concentration is 25  $\mu$ M. All error bars represent standard deviation. \*  $p < 0.05$ , \*\*  $p < 0.01$ , \*\*\*  $p < 0.001$
