# Supplementary material for: Pathogen‐induced inflammation is attenuated by the iminosugar MON‐DNJ via modulation of the unfolded protein response
Source: Immunology. 2021 Aug 1;164(3):587–601. doi: 10.1111/imm.13393 (PMC8517592; doi:10.1111/imm.13393)
Supplement: Supplementary file 4 — Table S1 [file IMM-164-587-s010.pdf]

**Supplemental Table 1 Statistical significance of differential cytokine expression**

[illegible]
